# Effect of vaccination on time till Long COVID, a comparison of two ways to model effect of vaccination and two outcome definitions

Peter D Smits, PhD<sup>1</sup>, Patricia J Rodriguez, PhD, MPH<sup>1</sup>, Samuel Gratzl, PhD<sup>1</sup>, Brianna M Goodwin Cartwright, MS<sup>1</sup>, Sarah Gilson, MD<sup>1</sup>, Ryan Lee, MD<sup>1</sup>, Charlotte Baker, DrPH, MPH, CPH<sup>1</sup>, and Nicholas L Stucky, MD, PhD<sup>1</sup>

<sup>1</sup>Truveta, Inc, Bellevue, WA  
\*nicholass@truveta.com

## Corresponding author:

Dr Nicholas Stucky  
Truveta, Inc  
1745 114th Ave SE, Bellevue, WA 98004  
Email: nicholass@truveta.com

## Abstract

Long COVID, or post-COVID syndrome, is a constellation of symptoms observed in patients at least four weeks after COVID-19 infection. We analyzed the effect of COVID-19 vaccination status on risk of either developing Long COVID symptoms or being diagnosed with Long COVID. In separate analyses we compared the effect of vaccination status at time of COVID-19 infection and the effect of vaccination status as a time-dependent covariate where vaccination could occur at any point with respect to COVID-19 infection.

To address this question, we identified a subset of adult patients from Truveta Data who experienced a COVID-19 infection as indicated by a positive laboratory test between 2021-10-01 and 2022-11-31. We considered two distinct ways of modeling the effect of vaccination status (time-independent and time-dependent) and two distinct outcomes of interest (Long COVID symptoms or diagnosis with Long COVID), representing four distinct analyses. The presence of Long COVID symptoms was defined as the presence of one or more new symptoms consistent with COVID-19/Long COVID at least four weeks post COVID-19 infection. Diagnosis of Long COVID was determined by the presence of one or more ICD-10-CM or SNOMED-CT codes explicitly identifying a patient as having been diagnosed with Long COVID.

Our analysis focusing on the effect of COVID-19 vaccination status at time of COVID-19 infection found that patients who had completed a primary COVID-19 vaccination sequence or had completed a primary vaccination sequence and received a booster dose at time of COVID-19 infection were on average at lower risk of either developing Long COVID symptoms or being diagnosed with Long COVID than unvaccinated patients (vaccinated versus unvaccinated HR of symptoms 0.9 [0.87-0.94], HR of diagnosis 0.86 [0.74-0.99]; vaccinated and boosted versus unvaccinated HR of symptoms 0.87 [0.83-0.91], HR of diagnosis 0.81 [0.69-0.95]). We

do not find evidence that having received a booster dose in addition to having completed a primary vaccination sequence offers additional protection over having completed the primary sequence alone (vaccinated and boosted versus vaccinated HR of symptoms 0.96 [0.91-1.01], HR of diagnosis 0.94-1.13) .

Our analysis of COVID-19 vaccination status modeled as a time-dependent covariate yielded similar results for patients who had completed a primary COVID-19 vaccination sequence or had completed a primary vaccination sequence and a booster dose. Both groups were on average at lower risk of developing Long COVID symptoms or being diagnosed with Long COVID than patients who were never vaccinated (vaccinated versus unvaccinated HR of symptoms 0.91 [0.88-0.95], HR of diagnosis 0.86 [0.75-0.99]; vaccinated and boosted versus unvaccinated HR of symptoms 0.88 [0.85-0.91], HR of diagnosis 0.77 [0.67-0.9]). As with the time-independent analysis, we also find that having completed a booster dose in addition to a primary COVID-19 vaccination sequence does not provide additional protection from developing Long COVID symptoms or being diagnosed with Long COVID over having completed the primary sequence alone (vaccinated and boosted versus vaccinated HR of symptoms 0.96 [0.92-1.01], HR of diagnosis 0.89 [0.76-1.06]) .

We find that completing a primary vaccination sequence is associated with a decreased risk of developing Long COVID symptoms or being diagnosed with Long COVID compared with no vaccination regardless of whether vaccination status is modeled as a time-independent or time-dependent covariate. We find a similar protective effect in patients who have completed a primary vaccination sequence and a booster dose when compared to the those who are unvaccinated. However, we do not find evidence for a difference in protective effect between patients who have completed a primary vaccination sequence and a booster dose and those patients who have only completed a primary vaccination sequence.

Our results support the growing evidence that having complete a primary vaccination sequence is protective against the development of Long COVID symptoms or the diagnosis of Long COVID.

## 1 Introduction

Long COVID is a constellation of symptoms that otherwise resist a clear understanding or diagnosis [1], and is a condition which is primarily a diagnosis of exclusion [2]. As of 2021-10-01, the World Health Organization (WHO) provided a definition of Long COVID and the associated constellation of symptoms [2]. At the same time, ICD-10-CM codes (U09.9) and SNOMED-CT codes (1119303003, 1119304009) were introduced in order to better classify which patients have been diagnosed with Long COVID versus having symptoms consistent with Long COVID [3–5].

In practice, however, Long COVID is defined in many ways and not necessarily in a consistent manner[6]. One common difference in studies of Long COVID is that some studies analyze time from infection until the abatement of COVID-19 symptoms while others focus on the time to development of new Long COVID symptoms following a COVID-19 infection [7–9]. Another common variation among studies of Long COVID is a difference in observation window, which varies between 4 weeks to 1 year following COVID-19 infection, with further variation on whether the study period includes or starts after the recommended 28 days post-COVID-19 infection wait period before identifying a patient as having Long COVID [7–10].

Studies of the effects of COVID-19 vaccination status on development of Long COVID or persistence of COVID-19 symptoms have primarily focused on two comparisons: 1) difference in outcome rate or probability between people who were unvaccinated at time of COVID-19 infection versus those people who were vaccinated (in some form) prior to having a COVID-19 infection [6, 10–27] and 2) difference in outcome rate or probability between people who were unvaccinated at time of COVID-19 infection versus those people who were vaccinated after having a COVID-19 infection [28–38]. Though see Simon et al. [39] for an example of an analysis of the effect of vaccination on the development of Long COVID which considers vaccination before and after COVID-19 infection.

The majority of studies and meta-analyses of the effects of vaccination prior to COVID-19 infection on risk of Long COVID have found that vaccination is protective against development of Long COVID symptoms and the persistence of COVID-19 symptoms [1, 6–9, 11, 27, 30]. In contrast, studies and subsequent meta-analyses of the effect of vaccination after COVID-19 on risk of Long COVID are fewer in number. Additionally, there is great heterogeneity in results, with the effect of vaccination after COVID-19 on risk of Long COVID having been show to either decrease, increase, or have no effect on the incidence or likelihood of Long COVID [7–9].

Here we estimate the effect of completing a primary COVID-19 vaccination sequence and the effect of a COVID-19 booster dose on either the risk of developing Long COVID symptoms or being diagnosed with Long COVID as separate analyses. We consider two ways of analyzing vaccination state: time-independent where we only considered completion of primary vaccination sequence and booster doses received prior to COVID-19 infection, and completion of primary vaccination sequence and booster doses as time-dependent covariates where these events can have occurred at any point relative to when a patient experienced a COVID-19 infection.

## 2 Methods

### Study Setting

The study population included a subset of Truveta Data focusing on patients who had a positive COVID-19 PCR test between 2021-10-01 and 2022-11-31 [40]. We used Truveta Studio to access the de-identified medical records used in this study on 2023-04-05. Truveta is a consortium of healthcare

43 systems which have combined their electronic health record (EHR) data to enable medical research.  
44 Currently this consortium includes 28 members who provide patient care in over 20,000 clinics and  
45 700 hospitals across 43 states. Updated data is provided daily to Truveta. Similar data fields across  
46 systems are mapped through syntactic normalization to a common schema referred to as the Truveta  
47 Data Model (TDM). Once organized into common fields, values are then semantically normalized  
48 to common ontologies such as ICD-10-CM, SNOMED-CT, LOINC, RxNorm, CVX, etc. These  
49 normalization procedures employ an expert-led, artificial intelligence driven process to accomplish  
50 high-confidence modeling at scale. The data are then de-identified by expert determination under  
51 the HIPAA Privacy Rule. Once de-identified, the data are then made available for analysis using  
52 Truveta Studio.

## 53 **2.1 Population**

54 Patients were included if they had their first positive COVID-19 laboratory test indicating infection  
55 between 2021-10-01 through 2022-11-30. The start of this study period was chosen because it  
56 represents when the ICD-10-CM code for a Long COVID diagnosis were created and put into effect  
57 [41].

58 Patients were excluded from analysis if they have had evidence of more than one COVID-  
59 19 infection in their medical history. We also excluded any patients who were younger than 18  
60 years old at time of COVID-19 infection. Additionally, we also excluded patients who were only  
61 partially vaccinated with an mRNA vaccine sequence and never completed their primary sequence  
62 (see 2.1.1). Finally, patients were excluded for various data hygiene reasons (diagnosed with Long  
63 COVID before testing positive for COVID-19, having a booster dose before completing a primary  
64 vaccination sequence, or an impossibly long time between vaccination and COVID-19 infection  
65 (e.g., being vaccinated more than 2.5 years prior to COVID-19 infection, or being diagnosed with  
66 COVID-19 more than 3 years before getting vaccinated).

67 Time zero ( $T_0$ ) for this study was the time of positive COVID-19 laboratory test plus 28 days.  
68 This 28 day period was implemented as Long COVID is only diagnosable 28 days after COVID-  
69 19 infection [7–10]. If we did not implement this 28 day wait, then we would be artificially and  
70 uniformly increasing the time to event.

71 We considered two treatments, or exposures, in our study: completion of primary COVID-19  
72 vaccination sequence, and a booster COVID-19 vaccine dose (see 2.1.1). Below we present two  
73 ways of analyze the effect of either of these exposures: a time-independent approach where only  
74 vaccination events prior to COVID-19 infection are considered, and a time-dependent approach  
75 where vaccination events were allowed to have occurred at any point relative to that patient's  
76 COVID-19 infection.

### 77 **2.1.1 Vaccination sequence logic**

78 Vaccination sequence algorithm is based on the COVID-19 vaccination sequence recommendations  
79 provided by the CDC [42] with the modification that we allowed for discordance in the primary  
80 sequence (mixture of either a Moderna, Pfizer, or Novavax vaccine doses).

81 If patients' first dose was an mRNA vaccine, a check is performed for a second dose of mRNA  
82 vaccine within 3 to 8 weeks of the first dose. If a person has a second mRNA dose, but it does  
83 not fall within this 3 to 8 week window, this person is excluded from our analysis. While Pfizer  
84 and Moderna have different wait periods between doses, this window encompasses both definitions  
85 and allows for discordance between dose manufacturers. If the patients first dose was a traditional

86 vaccine (i.e. Janssen), then only that single dose is required to have completed the doses for the  
87 primary sequence.

88 A patient's time of having completed their primary vaccination sequence is two weeks after  
89 either their second mRNA dose or two weeks after their first traditional vaccine dose.

90 For a list of all CVX codes used to identify a vaccination, please see the Supplemental Material.

## 91 2.2 Outcomes

92 We considered two different definitions of Long COVID as our event of interest. These responses  
93 were analyzed independently with their own models as they describe very different aspects of our  
94 patient population.

95 Our first definition of Long COVID is based on the definition provided by the CDC where a  
96 constellation of symptoms are used as diagnostic criteria. We modified this definition slightly to  
97 only consider patients who tested positive for COVID-19 based on PCR test results.

98 Patients with this phenotype have or had long COVID based on the CDC's published guidelines.  
99 A patient who had a positive COVID-19 PCR test and a specific symptom four or more weeks after  
100 the COVID-19 infection with no diagnosis code for the specific sign or symptom in the year prior to  
101 the COVID-19 infection, excluding the week prior. Symptoms of Long COVID include abdominal  
102 pain, anosmia, anxiety and/or depression, arthralgia, dyspnea, chest pain, cognitive impairment,  
103 cough, diarrhea, fatigue, fever, headache, impaired daily function, insomnia, lightheadedness, men-  
104 strual cycle irregularities, mood changes, myalgia, pain, palpitations and tachycardia, paresthesia,  
105 post-exertional malaise, and rash. For a complete set of codes associated with Long COVID and  
106 its symptoms, please see the Supplemental Material.

107 For analyses of the presence of Long COVID symptoms as the outcome of interest, a patient's  
108 outcome time was defined as the minimum of the following: time of first development of new Long  
109 COVID symptoms, last recorded encounter in the EHR after their positive COVID-19 test, or 365  
110 days (if their last encounter in the EHR was greater than 365 days after T0). Time till event  
111 was expressed in weeks (continuous). If a person did not experience the development of Long  
112 COVID symptoms, then they were right-censored at their last recorded time as described above.  
113 We considered all censoring to be uninformative. In the event a patient has no EHR events after  
114 their positive test result, that patient's outcome time was defined as the time of positive COVID-19  
115 test plus 28 days (e.g., time zero) plus  $5 \times 10^{-7}$  weeks. The fractional amount of time is added to  
116 the outcome time of patients who's last encounter in the EHR was their positive COVID-19 test  
117 because, by definition, patient's cannot have an outcome time of 0 as  $S(t = 0) = 1$  [43]. This  
118 fractional amount of time is the minimum amount of time which does not cause the R package  
119 `survival` to error when attempting to fit a Cox regression model, as values smaller than  $5 \times 10^{-7}$   
120 are below the tolerance for detecting if outcome time is 0.

121 Our second definition of Long COVID only considered patients who were diagnosed with Long  
122 COVID as indicated by relevant ICD-10-CM or SNOMED-CT diagnostic codes being present as  
123 a diagnosis. See the Supplemental Material for a full list of the ICD-10-CM and SNOMED-CT  
124 diagnostic codes used to identify if a patient was diagnosed with Long COVID in this study.

125 For the analysis of time till diagnosis with Long COVID, a patient's outcome time was defined  
126 as the minimum of the following: time of Long COVID diagnosis, last recorded encounter in the  
127 EHR after their positive COVID-19 test, or 365 days (if their last encounter in the EHR was greater  
128 than 365 days after T0). Time till event was expressed in weeks. In the event a patient has no  
129 EHR events after their positive test result, that patient's outcome time was defined as the time

130 of positive COVID-19 test plus 28 days (e.g., time zero) plus  $5 \times 10^{-7}$  weeks. The logic for these  
131 decisions was identical as our choices described above for our analysis of time till development of  
132 Long COVID symptoms.

133 We performed sensitivity analyses to determine if excluding those patients with effectively zero  
134 follow-up time had a meaningful impact on our results. Please see the Supplemental Material for  
135 those results.

### 136 **2.3 Comorbidities, demographics, and descriptive covariates**

137 In addition to vaccination and booster status, we considered the following conditions as potential  
138 confounding features: anxiety, cardiovascular disease, cancer, cerebrovascular disease or stroke or  
139 transient ischemic attack (as one condition), chronic kidney disease, chronic obstructive pulmonary  
140 disease, dementia, depression, diabetes, immunocompromised, and peripheral artery disease. A  
141 patient was considered to have a comorbidity if an associated diagnostic code was present in their  
142 record within the two years prior to T0. The definitions of anxiety and depression used for our  
143 comorbidities are more expansive than our definition of anxiety or depression used as symptoms of  
144 Long COVID. Please see the Supplementary Material for complete list of all diagnostic codes used  
145 to identify these comorbidities based on patient information.

146 We also considered the following demographic and descriptive features as potential confounding  
147 features: sex (Female, Male, Unknown), race (American Indian or Alaska Native, Asian, Black or  
148 African American, Native Hawaiian or Other Pacific Islander, White, and Other), ethnicity (Not  
149 Hispanic or Latino, Hispanic or Latino, and Unknown), age in years at time of COVID-19 infection,  
150 year-month of COVID-19 infection, smoking status, one or more influenza vaccines within the two  
151 years prior to T0, number of inpatient encounters within the two years prior to T0, and number of  
152 outpatient encounters within the two years prior to T0.

153 Year-month was included as a covariate to reflect the COVID-19 "environment" (e.g., variant,  
154 infected population size, etc.) experienced by the patient at the time of their infection. The presence  
155 of a previous influenza vaccine, along with number of inpatient and outpatient encounters, were  
156 considered proxies for a patient's likelihood to request or receive care as well as their overall health.

157 For a full list of diagnostic concept codes used to define the comorbidities and smoking status  
158 of our patients see the Supplemental Material.

### 159 **2.4 Model of time from 28 days after COVID-19 infection till Long 160 COVID**

161 We transformed some of the covariates prior to fitting our Cox regression models. The count of  
162 inpatient encounters within the last two years, and the count of outpatient encounters within the last  
163 two years were both square-root transformed prior to being included in the model. This transform  
164 stabilizes the variance of the covariate and attenuates the effect of large observations. Age in years  
165 at time of COVID-19 infection was modeled using a natural cubic spline with 5 degrees of freedom.  
166 All categorical covariates with more than 2 levels were transformed into multiple indicator variables,  
167 or one-hot encoded, with the most frequently occurring state being the "reference" category.

168 Hazard ratios comparing different combinations of COVID-19 vaccinated or boosted states to  
169 unvaccinated or vaccinated states were calculated using the `emmeans` R package [44].

#### 170 2.4.1 Time-independent treatment

171 Our first set of analyses of the effect of completing a primary COVID-19 vaccination sequence and  
172 receiving a booster dose versus being unvaccinated on time till Long COVID symptom develop-  
173 ment or diagnosis considered only patients who are either unvaccinated, have completed a primary  
174 vaccination sequence, or have completed a primary vaccination sequence and a booster dose prior  
175 to COVID-19 infection. Patients were excluded if they completed a primary vaccination sequence  
176 or received a booster dose after their COVID-19 infection (Section 2.2). This requirement is an  
177 additional exclusion criteria unique to the time-independent treatment analysis.

178 This model was fit using the `survival` R package [45].

#### 179 2.4.2 Time-dependent treatment

180 In addition to the time-independent approach considered above, we also performed an analysis where  
181 we allowed patients to complete their primary vaccination sequence or receive a booster dose at any  
182 point relative to their COVID-19 infection. To allow for time dependent covariates, we modeled  
183 time from 28 days after COVID-19 infection till Long COVID using an extended Cox regression  
184 model in order to account for the time-dependence of the vaccination events, meaning a person could  
185 have completed their primary vaccination sequence or booster dose before or after T0. Unlike the  
186 time-independent analysis described above, there are no additional exclusion criteria as all patients  
187 can be included regardless of when they completed their primary COVID-19 vaccination sequence  
188 or received a booster dose. Note, as before we're still excluding patients who were vaccinated during  
189 the 28 day waiting period between COVID-19 infection and this studies T0. These patients are  
190 excluded because they are not biologically directly comparable to patients who were vaccinated prior  
191 to a COVID-19 infection and the 28 day waiting period means we cannot distinguish, statistically,  
192 between vaccinated before or vaccinated within 28 days.

193 This model was fit using the `survival` R package [45]. See Terry M. Therneau and Patricia M.  
194 Grambsch [43] for further explanation of how time-dependent covariates are modeled in an extended  
195 Cox model.

196 All analyses were done using the R programming language [46] with a particular emphasis on the  
197 following packages: `survival` [45], `emmeans` [44], `broom` [47], `survminer` [48], `splines` [46], `dplyr`  
198 [49], `lubridate` [50], `rlang` [51], `tidyr` [52], `arrow` [53], `table1` [54], and `xtable` [55].

## 199 3 Results

### 200 3.1 Population

201 438,431 patients tested positive for COVID-19 between 2021-10-01 and 2022-11-30 and met our  
202 inclusion and exclusion criteria (Table 1). Of the patients in our study, 95,228 completed a COVID-  
203 19 primary vaccination sequence at any point, 49,204 received a booster dose at any point, and  
204 343,203 were never vaccinated. 93,505 were vaccinated prior to testing positive for COVID-19, and  
205 1,723 were later vaccinated after testing positive for COVID-19. Similarly, of those patients who  
206 received a booster vaccine dose, 39,911 received that booster prior to testing positive for COVID-19,  
207 and 9,293 later received that booster after testing positive for COVID-19.

| Feature                                   | Unvaccinated<br>(N=344,926) | Vaccinated<br>(N=53,594) | Vaccinated and boosted<br>(N=39,911) | Overall<br>(N=438,431) |
|-------------------------------------------|-----------------------------|--------------------------|--------------------------------------|------------------------|
| Sex                                       |                             |                          |                                      |                        |
| Female                                    | 196,659 (57.0%)             | 32,618 (60.9%)           | 23,121 (57.9%)                       | 252,398 (57.6%)        |
| Male                                      | 147,442 (42.7%)             | 20,894 (39.0%)           | 16,713 (41.9%)                       | 185,049 (42.2%)        |
| Unknown                                   | 825 (0.2%)                  | 82 (0.2%)                | 77 (0.2%)                            | 984 (0.2%)             |
| Age (y)                                   |                             |                          |                                      |                        |
| Mean (SD)                                 | 49.4 (19.9)                 | 50.8 (19.3)              | 61.1 (18.5)                          | 50.6 (20.0)            |
| Median [Min, Max]                         | 47.5 [17.9, 98.9]           | 49.7 [17.9, 98.8]        | 63.5 [17.9, 98.9]                    | 49.4 [17.9, 98.9]      |
| Year-month of COVID infection             |                             |                          |                                      |                        |
| 2021_10                                   | 20,051 (5.8%)               | 3,364 (6.3%)             | 138 (0.3%)                           | 23,553 (5.4%)          |
| 2021_11                                   | 15,967 (4.6%)               | 2,655 (5.0%)             | 272 (0.7%)                           | 18,894 (4.3%)          |
| 2021_12                                   | 51,835 (15.0%)              | 6,503 (12.1%)            | 1,562 (3.9%)                         | 59,900 (13.7%)         |
| 2022_01                                   | 110,238 (32.0%)             | 20,514 (38.3%)           | 8,453 (21.2%)                        | 139,205 (31.8%)        |
| 2022_02                                   | 19,200 (5.6%)               | 3,092 (5.8%)             | 2,138 (5.4%)                         | 24,430 (5.6%)          |
| 2022_03                                   | 5,436 (1.6%)                | 787 (1.5%)               | 811 (2.0%)                           | 7,034 (1.6%)           |
| 2022_04                                   | 7,520 (2.2%)                | 916 (1.7%)               | 1,307 (3.3%)                         | 9,743 (2.2%)           |
| 2022_05                                   | 16,879 (4.9%)               | 2,507 (4.7%)             | 3,568 (8.9%)                         | 22,954 (5.2%)          |
| 2022_06                                   | 21,268 (6.2%)               | 2,985 (5.6%)             | 4,723 (11.8%)                        | 28,976 (6.6%)          |
| 2022_07                                   | 28,102 (8.1%)               | 3,631 (6.8%)             | 5,466 (13.7%)                        | 37,199 (8.5%)          |
| 2022_08                                   | 20,525 (6.0%)               | 2,702 (5.0%)             | 4,264 (10.7%)                        | 27,491 (6.3%)          |
| 2022_09                                   | 11,920 (3.5%)               | 1,419 (2.6%)             | 2,670 (6.7%)                         | 16,009 (3.7%)          |
| 2022_10                                   | 7,620 (2.2%)                | 1,075 (2.0%)             | 2,053 (5.1%)                         | 10,748 (2.5%)          |
| 2022_11                                   | 8,365 (2.4%)                | 1,444 (2.7%)             | 2,486 (6.2%)                         | 12,295 (2.8%)          |
| Race                                      |                             |                          |                                      |                        |
| American Indian or Alaska Native          | 2,050 (0.6%)                | 633 (1.2%)               | 413 (1.0%)                           | 3,096 (0.7%)           |
| Asian                                     | 7,552 (2.2%)                | 2,111 (3.9%)             | 2,389 (6.0%)                         | 12,052 (2.7%)          |
| Black or African American                 | 60,578 (17.6%)              | 3,030 (5.7%)             | 1,443 (3.6%)                         | 65,051 (14.8%)         |
| Native Hawaiian or Other Pacific Islander | 924 (0.3%)                  | 319 (0.6%)               | 141 (0.4%)                           | 1,384 (0.3%)           |
| Other                                     | 58,676 (17.0%)              | 9,373 (17.5%)            | 5,758 (14.4%)                        | 73,807 (16.8%)         |
| White                                     | 215,146 (62.4%)             | 38,128 (71.1%)           | 29,767 (74.6%)                       | 283,041 (64.6%)        |
| Ethnicity                                 |                             |                          |                                      |                        |
| Not Hispanic or Latino                    | 266,171 (77.2%)             | 42,166 (78.7%)           | 33,400 (83.7%)                       | 341,737 (77.9%)        |
| Hispanic or Latino                        | 49,535 (14.4%)              | 8,134 (15.2%)            | 4,323 (10.8%)                        | 61,992 (14.1%)         |
| Unknown                                   | 29,220 (8.5%)               | 3,294 (6.1%)             | 2,188 (5.5%)                         | 34,702 (7.9%)          |
| Anxiety                                   |                             |                          |                                      |                        |
| Yes                                       | 52,122 (15.1%)              | 11,563 (21.6%)           | 8,769 (22.0%)                        | 72,454 (16.5%)         |

∞

Continued on next page



Table 1 – continued from previous page

| Feature                                    | Unvaccinated    | Vaccinated     | Vaccinated and boosted | Overall         |
|--------------------------------------------|-----------------|----------------|------------------------|-----------------|
| No                                         | 292,804 (84.9%) | 42,031 (78.4%) | 31,142 (78.0%)         | 365,977 (83.5%) |
| Cardiovascular Disease                     |                 |                |                        |                 |
| Yes                                        | 122,775 (35.6%) | 21,548 (40.2%) | 20,631 (51.7%)         | 164,954 (37.6%) |
| No                                         | 222,151 (64.4%) | 32,046 (59.8%) | 19,280 (48.3%)         | 273,477 (62.4%) |
| Cancer                                     |                 |                |                        |                 |
| Yes                                        | 16,673 (4.8%)   | 3,776 (7.0%)   | 5,299 (13.3%)          | 25,748 (5.9%)   |
| No                                         | 328,253 (95.2%) | 49,818 (93.0%) | 34,612 (86.7%)         | 412,683 (94.1%) |
| Cerebrovascular Disease/Stroke/TIA         |                 |                |                        |                 |
| Yes                                        | 20,137 (5.8%)   | 3,816 (7.1%)   | 4,686 (11.7%)          | 28,639 (6.5%)   |
| No                                         | 324,789 (94.2%) | 49,778 (92.9%) | 35,225 (88.3%)         | 409,792 (93.5%) |
| CKD                                        |                 |                |                        |                 |
| Yes                                        | 28,319 (8.2%)   | 5,248 (9.8%)   | 6,306 (15.8%)          | 39,873 (9.1%)   |
| No                                         | 316,607 (91.8%) | 48,346 (90.2%) | 33,605 (84.2%)         | 398,558 (90.9%) |
| COPD                                       |                 |                |                        |                 |
| Yes                                        | 20,660 (6.0%)   | 3,458 (6.5%)   | 3,455 (8.7%)           | 27,573 (6.3%)   |
| No                                         | 324,266 (94.0%) | 50,136 (93.5%) | 36,456 (91.3%)         | 410,858 (93.7%) |
| Dementia                                   |                 |                |                        |                 |
| Yes                                        | 13,828 (4.0%)   | 2,266 (4.2%)   | 2,641 (6.6%)           | 18,735 (4.3%)   |
| No                                         | 331,098 (96.0%) | 51,328 (95.8%) | 37,270 (93.4%)         | 419,696 (95.7%) |
| Depression                                 |                 |                |                        |                 |
| Yes                                        | 76,451 (22.2%)  | 18,873 (35.2%) | 15,396 (38.6%)         | 110,720 (25.3%) |
| No                                         | 268,475 (77.8%) | 34,721 (64.8%) | 24,515 (61.4%)         | 327,711 (74.7%) |
| Diabetes                                   |                 |                |                        |                 |
| Yes                                        | 48,932 (14.2%)  | 8,918 (16.6%)  | 8,855 (22.2%)          | 66,705 (15.2%)  |
| No                                         | 295,994 (85.8%) | 44,676 (83.4%) | 31,056 (77.8%)         | 371,726 (84.8%) |
| Immunocompromised                          |                 |                |                        |                 |
| Yes                                        | 74,243 (21.5%)  | 13,919 (26.0%) | 14,514 (36.4%)         | 102,676 (23.4%) |
| No                                         | 270,683 (78.5%) | 39,675 (74.0%) | 25,397 (63.6%)         | 335,755 (76.6%) |
| PAD                                        |                 |                |                        |                 |
| Yes                                        | 11,133 (3.2%)   | 2,691 (5.0%)   | 3,379 (8.5%)           | 17,203 (3.9%)   |
| No                                         | 333,793 (96.8%) | 50,903 (95.0%) | 36,532 (91.5%)         | 421,228 (96.1%) |
| Smoking Status                             |                 |                |                        |                 |
| Yes                                        | 66,103 (19.2%)  | 11,320 (21.1%) | 8,793 (22.0%)          | 86,216 (19.7%)  |
| No                                         | 278,823 (80.8%) | 42,274 (78.9%) | 31,118 (78.0%)         | 352,215 (80.3%) |
| 1+ influenza vaccines within 2 years prior |                 |                |                        |                 |
| Yes                                        | 24,399 (7.1%)   | 20,358 (38.0%) | 22,465 (56.3%)         | 67,222 (15.3%)  |

Continued on next page

**Table 1 – continued from previous page**

| Feature                                                | Unvaccinated    | Vaccinated      | Vaccinated and boosted | Overall         |
|--------------------------------------------------------|-----------------|-----------------|------------------------|-----------------|
| No                                                     | 320,527 (92.9%) | 33,236 (62.0%)  | 17,446 (43.7%)         | 371,209 (84.7%) |
| Number of inpatient encounters within last 2 years     |                 |                 |                        |                 |
| Mean (SD)                                              | 0.295 (2.43)    | 0.568 (3.93)    | 0.649 (3.80)           | 0.360 (2.81)    |
| Median [Min, Max]                                      | 0 [0, 382]      | 0 [0, 278]      | 0 [0, 246]             | 0 [0, 382]      |
| Number of outpatient encounters within last 2 years    |                 |                 |                        |                 |
| Mean (SD)                                              | 15.5 (35.5)     | 39.6 (67.4)     | 48.8 (75.4)            | 21.5 (46.9)     |
| Median [Min, Max]                                      | 2.00 [0, 1,200] | 16.0 [0, 1,400] | 23.0 [0, 1,730]        | 4.00 [0, 1,730] |
| Number of unique blood panel labs within 2 years prior |                 |                 |                        |                 |
| Mean (SD)                                              | 29.0 (110)      | 43.0 (129)      | 50.0 (136)             | 32.7 (115)      |
| Median [Min, Max]                                      | 0 [0, 10,800]   | 0 [0, 4,880]    | 11.0 [0, 6,410]        | 0 [0, 10,800]   |
| Developed Long COVID symptoms                          |                 |                 |                        |                 |
| Yes                                                    | 46,108 (13.4%)  | 8,334 (15.6%)   | 5,197 (13.0%)          | 59,639 (13.6%)  |
| No                                                     | 298,818 (86.6%) | 45,260 (84.4%)  | 34,714 (87.0%)         | 378,792 (86.4%) |
| Diagnosed with Long COVID                              |                 |                 |                        |                 |
| Yes                                                    | 2,170 (0.6%)    | 603 (1.1%)      | 437 (1.1%)             | 3,210 (0.7%)    |
| No                                                     | 342,756 (99.4%) | 52,991 (98.9%)  | 39,474 (98.9%)         | 435,221 (99.3%) |

Table 1: Overall summary statistics of our analyzed population of patients who experienced a COVID-19 infection, stratified by vaccination status at time of COVID-19 infection.

208 When we compare which patients had either of our outcomes of interest we observe that there is  
209 surprisingly little overlap between the population for which we observe either the presence of Long  
210 COVID symptoms or a diagnosis with Long COVID (Table 2).

| Symptoms / Diagnosis   | Long COVID Diagnosis | No Long COVID Diagnosis |
|------------------------|----------------------|-------------------------|
| Long COVID Symptoms    | 957                  | 58,682                  |
| No Long COVID Symptoms | 2,253                | 376,539                 |

Table 2: Contingency table comparing overlap in differing Long COVID outcomes among patients.

211 Of our 438,431 patients, 59,639 experienced Long COVID symptoms at least 28 days after their  
212 COVID-19 infection while 3,210 were given a diagnosis on Long COVID at least 28 days after their  
213 COVID-19 infection.

## 214 3.2 Risk of Long COVID associated with vaccination status

### 215 3.2.1 Time-independent

216 We present here the results from our analysis of patients who were vaccinated, vaccinated and  
217 boosted, and unvaccinated prior to experiencing a COVID-19 infection, excluding any patients who  
218 either completed their primary COVID-19 vaccination sequence or received a booster dose after  
219 experiencing a COVID-19 infection. There were a total of 427,703 patients in this analysis.

220 First, we present our results for the analysis of time till development of Long COVID symp-  
221 toms. Kaplan-Meier estimated survival curves demonstrate obvious differences in time till outcome  
222 between persons with the unvaccinated state compared those with the vaccinated or vaccinated  
223 and boosted states (Fig. 1). In contrast, there is little perceptible difference between the estimated  
224 survival curves for those patients who were vaccinated versus those patients who were vaccinated  
225 and boosted.

226 The patterns from the Kaplan-Meier curves are consistent with hazard ratios estimated as part  
227 of our Cox regression model where time till event is further conditioned on multiple comorbidities  
228 and demographic features (Fig. 2, Table 3). We find that, when considering only those vaccination  
229 events prior to COVID-19 infection, patients who are vaccinated are at a lower risk of developing  
230 Long COVID symptoms than those who are unvaccinated (Fig.2, Table 3). Similarly, those who  
231 are vaccinated and boosted are at a lower risk of developing Long COVID symptoms than those  
232 who are unvaccinated. Finally, we find no evidence of a difference in risk of developing symptoms  
233 of Long COVID between patients who are vaccinated and boosted versus those patients who are  
234 vaccinated (Fig.2, Table 3).

| Comparison                             | Hazard Ratio [95% CI] |
|----------------------------------------|-----------------------|
| vaccinated vs unvaccinated             | 0.9 [0.87, 0.94]      |
| vaccinated and boosted vs unvaccinated | 0.87 [0.83, 0.91]     |
| vaccinated and boosted vs vaccinated   | 0.96 [0.91, 1.01]     |

Table 3: Estimated hazard ratios for risk of developing Long COVID symptoms based on vaccination status at time of COVID infection. Hazard ratios are presented with 95% confidence intervals.

235 In contrast to the results with presence of Long COVID symptoms as our outcome of interest,  
236 when we consider a diagnosis of Long COVID as our response of interest, the estimated survival are

## Survival curves for time till developing Long COVID symptoms

Vaccination status at time of COVID infection

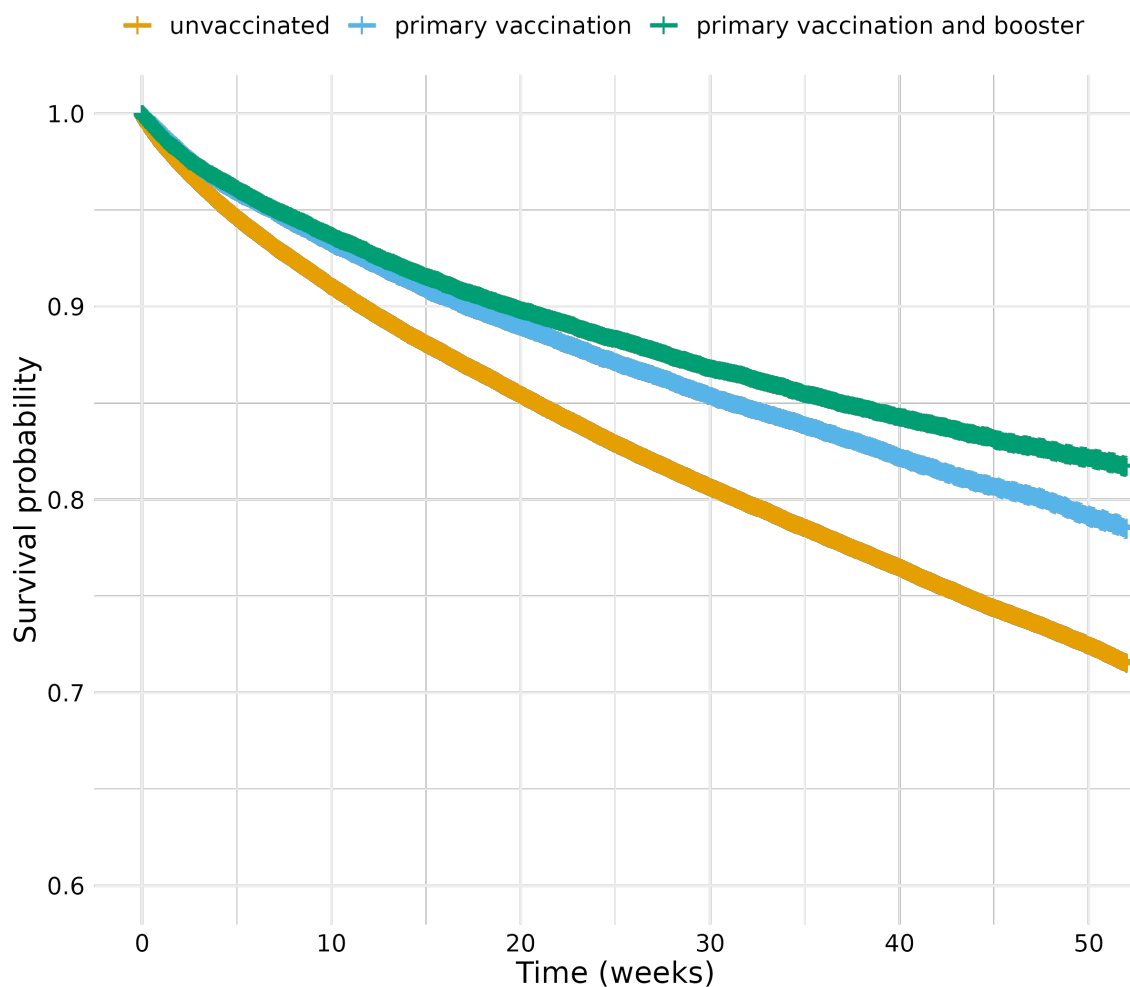

Figure 1: Kaplan-Meier curves of time till development of Long COVID symptoms for patients with different COVID-19 vaccination states (i.e., unvaccinated, completed primary vaccination sequence, and vaccinated plus having received a booster doses). For this analysis, we considered only vaccination state at time of COVID-19 infection.

## Hazard ratio for risk of developing Long COVID symptoms

Vaccination status at time of COVID infection

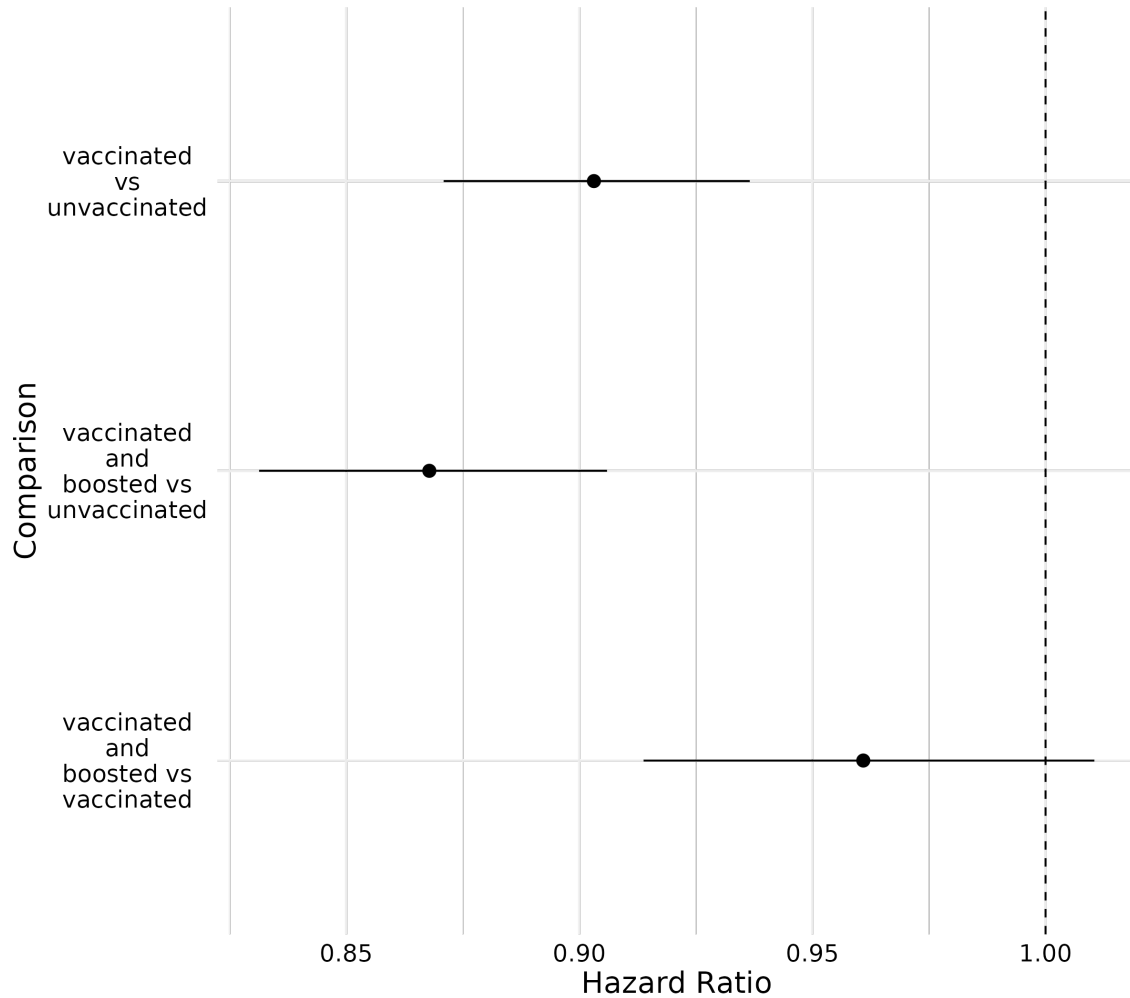

Figure 2: Graphical comparison of estimated hazard ratios for risk of developing Long COVID symptoms 28 days after COVID-19 infection depending on a person's vaccination state at time of COVID-19 infection (i.e., unvaccinated, completed primary vaccination sequence, and vaccinated plus having received a booster doses). Estimates are presented with 95% confidence intervals.

237 nearly flat over time (Fig. 3), which is consistent with how rare this diagnosis is in our population  
238 (Tables 1, 2). Whatever difference in time till diagnosis that exists between the unvaccinated,  
239 vaccinated, and vaccinated and boosted populations are extremely small in terms of absolute effect.

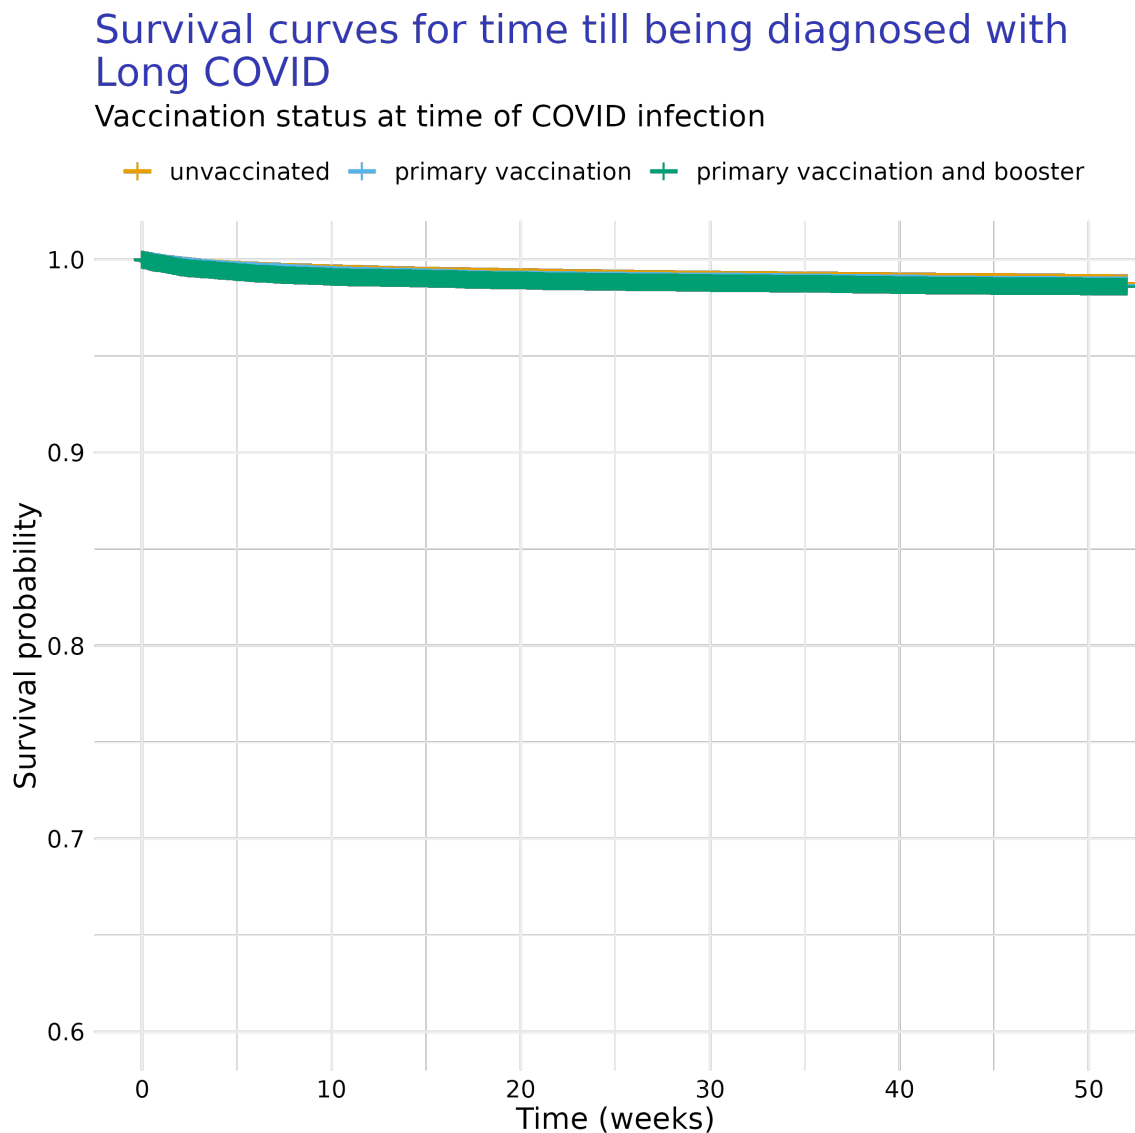

Figure 3: Kaplan-Meier curves of time till diagnosis with Long COVID for patients with different COVID-19 vaccination states (i.e., unvaccinated, completed primary vaccination sequence, and vaccinated plus having received a booster doses). For this analysis, we considered only vaccination state at time of COVID-19 infection, and all subsequent vaccination events are ignored.

240 The pattern from the Kaplan-Meier curves is effectively retained when time till development of

241 Long COVID symptoms is further conditioned on the comorbidities and patient descriptive features  
242 described above, as evidenced by the hazard ratios estimated as part of our Cox regression model  
243 (Fig.4, Table 4).

244 We find that, when considering only those vaccination events prior to COVID-19 infection,  
245 patients who are vaccinated are at a lower risk of being diagnosed with Long COVID than those  
246 who are unvaccinated (Fig. 4, Table 4). Similarly, we find that patients who are vaccinated and  
247 boosted have a lower risk of being diagnosed with Long COVID over time than the unvaccinated.  
248 Additionally, we do not find evidence of a difference in risk in receiving a Long COVID diagnosis  
249 between patients who are vaccinated and boosted versus those patients who were only vaccinated  
250 (Fig. 4, Table 4).

| Comparison                             | Hazard Ratio [95% CI] |
|----------------------------------------|-----------------------|
| vaccinated vs unvaccinated             | 0.86 [0.74, 0.99]     |
| vaccinated and boosted vs unvaccinated | 0.81 [0.69, 0.95]     |
| vaccinated and boosted vs vaccinated   | 0.94 [0.79, 1.13]     |

Table 4: Estimated hazard ratios for risk of being diagnosed with Long COVID based on vaccination status at time of COVID infection. Hazard ratios are presented with 95% confidence intervals.

### 251 3.2.2 Time-dependent

252 We present here the results from our analysis of patients who were vaccinated, vaccinated and  
253 boosted, and unvaccinated at any time relative to their COVID-19 infection, with vaccination  
254 events considered as time-dependent covariates.

255 We had a total of 438,431 people when we allowed vaccination and booster timing to vary  
256 with respect to COVID-19 infection, accounting for individuals who were completed a primary  
257 vaccination sequence or received a booster dose after their COVID-19 infection.

258 Estimated survival functions for the time from T0 till development of Long COVID symptoms  
259 with vaccination state treated as a time-dependent covariate (Fig. 5) have a similar pattern to the  
260 survival curves estimated from the time-independent analysis (Fig. 1). We see obvious differences  
261 in the time till outcome between persons with the unvaccinated state compared those with the  
262 vaccinated or vaccinated and boosted states (Fig. 5).

263 The pattern from the Kaplan-Meier curves is effectively retained when time till development of  
264 Long COVID symptoms is further conditioned on the comorbidities and patient descriptive features  
265 described above, as evidenced by the hazard ratios estimated as part of our Cox regression model  
266 (Fig.6, Table 5). We find that patients who are vaccinated are at a lower risk of developing Long  
267 COVID symptoms than those who are unvaccinated (Fig. 6, Table 5). Similarly, those who are  
268 vaccinated and boosted are at a lower risk of developing Long COVID symptoms than those who  
269 are unvaccinated. Finally, we also find no evidence of a difference in risk of developing Long COVID  
270 symptoms between patients vaccinated and boosted versus those patients who are vaccinated (Fig. 6,  
271 Table 5).

272 In contrast, when we consider a diagnosis of Long COVID as our response of interest along with  
273 treating vaccination status as a time-dependent covariate, the estimated survival are nearly flat  
274 over time (Fig. 7), which is consistent with how rare this diagnosis is in our population (Table 1).  
275 Whatever difference exists between the unvaccinated, vaccinated, and vaccinated and boosted popu-  
276 lations they are extremely small in absolute effect on time till diagnosis. These results are consistent

## Hazard ratio for risk of being diagnosed with Long COVID

Vaccination status at time of COVID infection

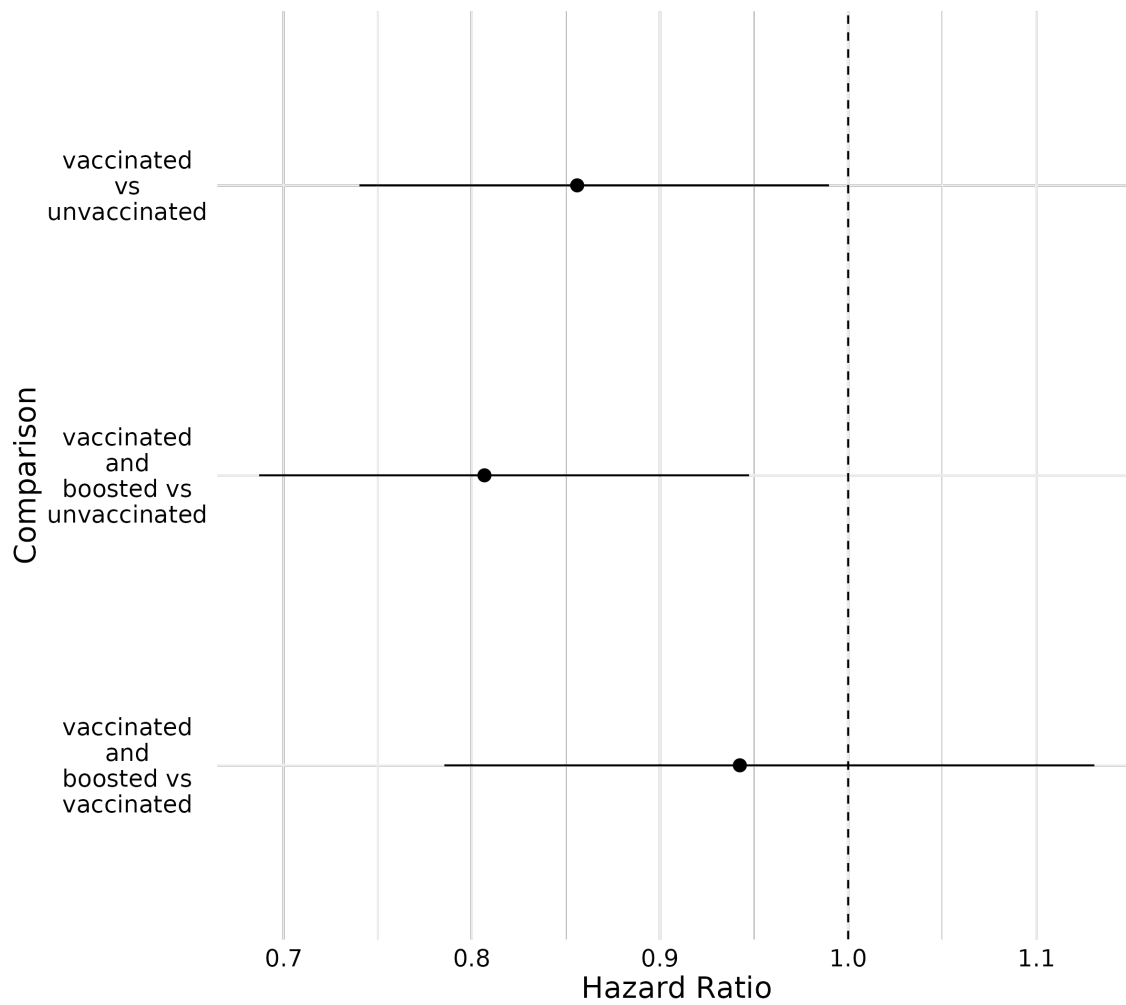

Figure 4: Comparison of estimated hazard ratios for risk of being diagnosed with Long COVID after COVID-19 infection depending on a person's vaccination state at time of COVID-19 infection (i.e., unvaccinated, completed primary vaccination sequence, and vaccinated plus having received a booster doses). Estimates are presented with 95% confidence intervals. For this analysis, we considered only vaccination state at time of COVID-19 infection, and all subsequent vaccination events are ignored.



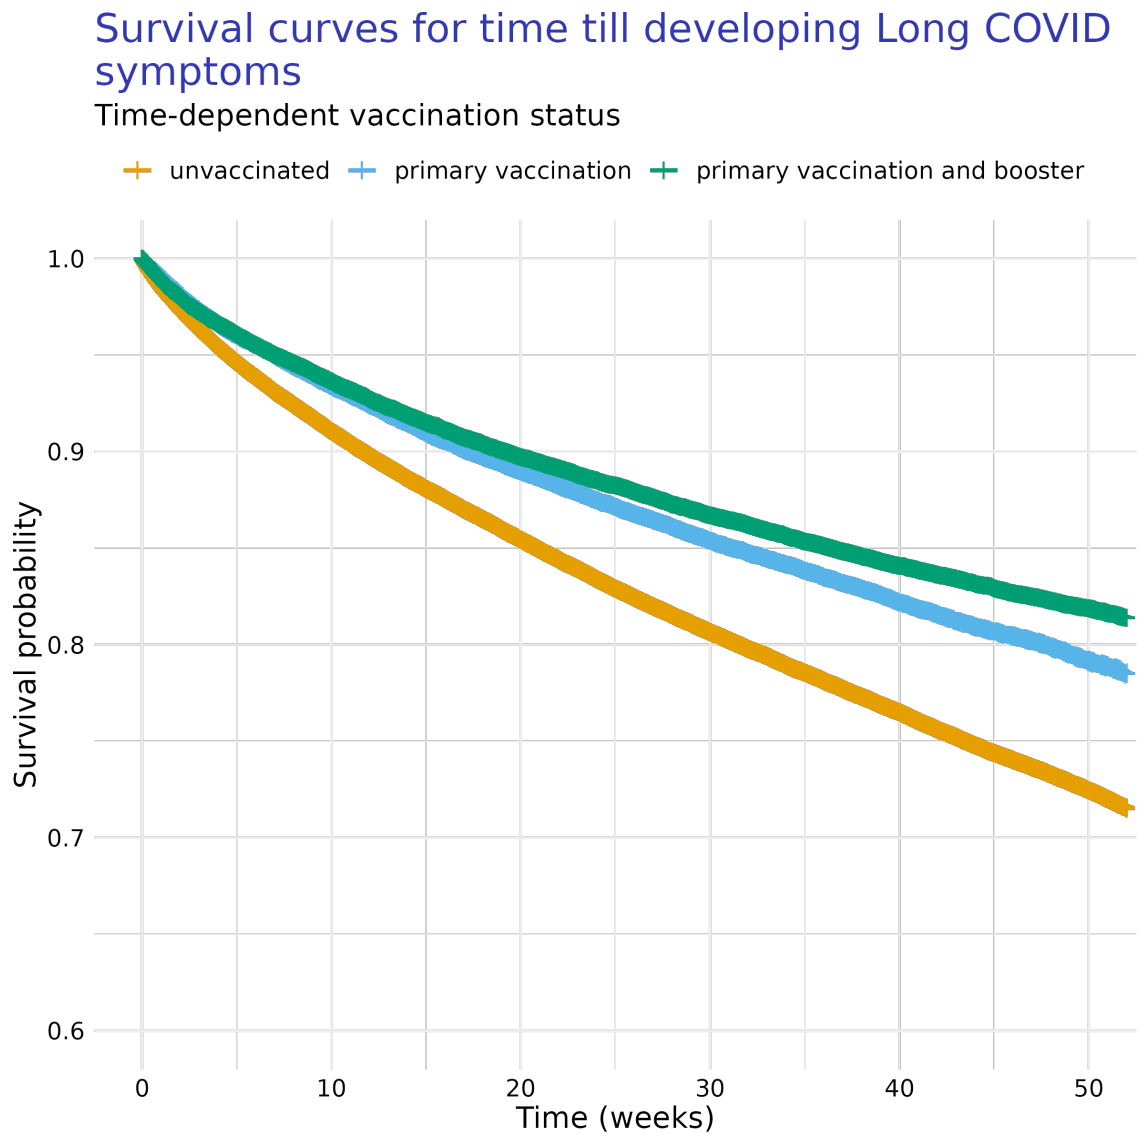

Figure 5: Kaplan-Meier curves of time till development of Long COVID symptoms depending on patient's COVID-19 vaccination status (i.e., unvaccinated, completed primary vaccination sequence, and vaccinated plus having received a booster doses). For this analysis, we considered vaccination and booster states as time-dependent covariates, meaning they can happen at any point relative to T0.

## Hazard ratio for risk of developing Long COVID symptoms

Time-dependent vaccination status

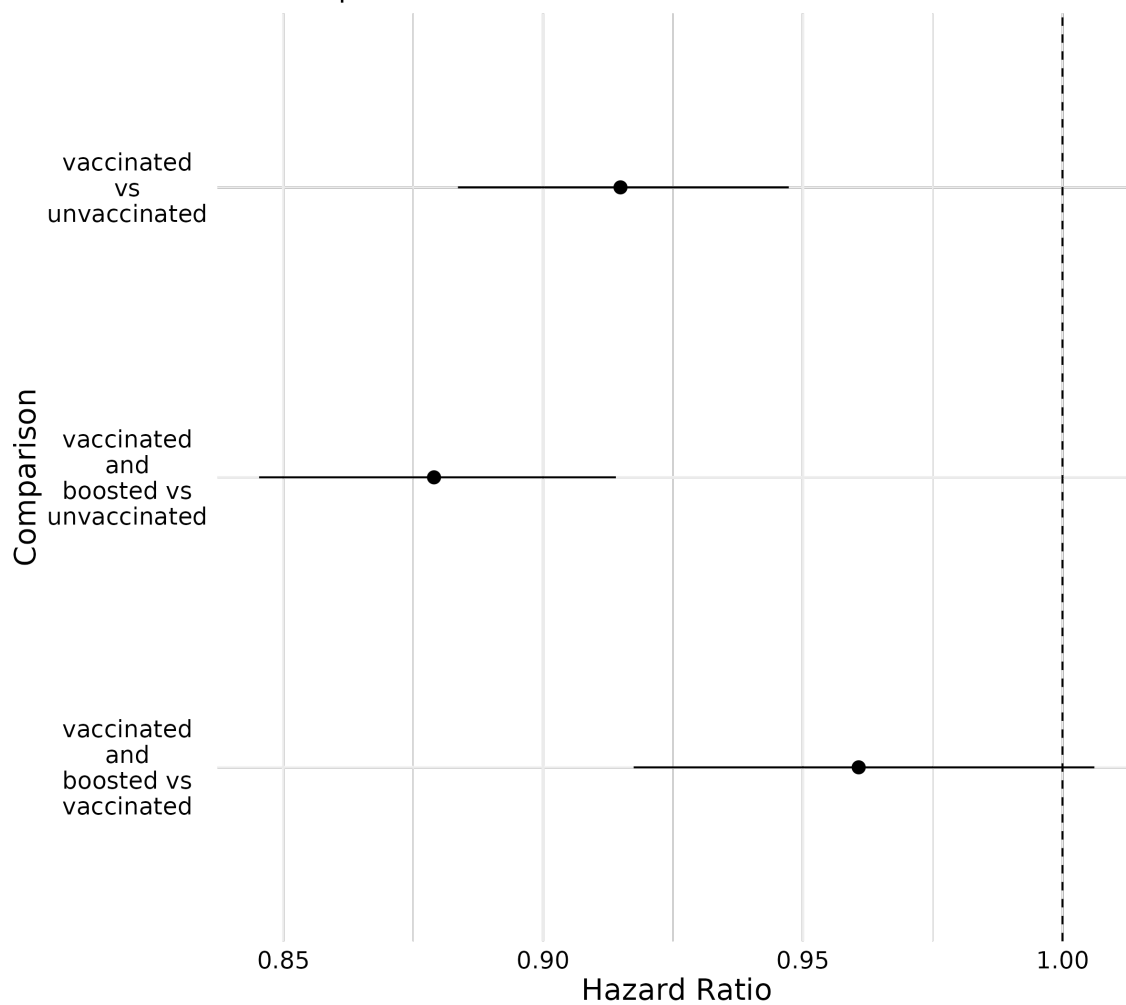

Figure 6: Comparison of estimated hazard ratios for risk of developing Long COVID symptoms after COVID-19 infection based on a person's vaccination state at time of COVID-19 infection (i.e., unvaccinated, completed primary vaccination sequence, and vaccinated plus having received a booster doses). Estimates are presented with 95% confidence intervals. For this analysis, we considered vaccination and booster states as time-dependent covariates, meaning they can happen at any point relative to T0.

| Comparison                             | Hazard Ratio [95% CI] |
|----------------------------------------|-----------------------|
| vaccinated vs unvaccinated             | 0.91 [0.88, 0.95]     |
| vaccinated and boosted vs unvaccinated | 0.88 [0.85, 0.91]     |
| vaccinated and boosted vs vaccinated   | 0.96 [0.92, 1.01]     |

Table 5: Estimated hazard ratios for risk of developing Long COVID symptoms associated with vaccination status where vaccination status is modeled as time-dependent covariates. Hazard ratios are presented with 95% confidence intervals.

277 with the previous analysis where only vaccination events prior to T0 were considered.

278 The pattern from the Kaplan-Meier curves is effectively retained when time till development of  
279 Long COVID symptoms is further conditioned on the comorbidities and patient descriptive features  
280 described above, as evidenced by the hazard ratios estimated as part of our Cox regression model  
281 (Fig.8, Table 6). These results are consistent with the previous analysis where only vaccination  
282 events prior to T0 were considered.

283 We find that, when vaccination and booster status are modeled as time-dependent covariates,  
284 patients who are vaccinated are at a lower risk of being diagnosed with Long COVID than those  
285 who are unvaccinated (Fig. 8). Similarly, we find that patients who are vaccinated and boosted  
286 have a lower risk of being diagnosed with Long COVID over time than the unvaccinated. Finally,  
287 we find no evidence of a difference in risk of developing Long COVID symptoms between patients  
288 vaccinated and boosted versus those patients who are vaccinated (Fig. 8, Table 6).

| Comparison                             | Hazard Ratio [95% CI] |
|----------------------------------------|-----------------------|
| vaccinated vs unvaccinated             | 0.86 [0.75, 0.99]     |
| vaccinated and boosted vs unvaccinated | 0.77 [0.67, 0.9]      |
| vaccinated and boosted vs vaccinated   | 0.89 [0.76, 1.06]     |

Table 6: Estimated hazard ratios for risk of being diagnosed with Long COVID associated with vaccination status where vaccination status is modeled as time-dependent covariates. Hazard ratios are presented with 95% confidence intervals.

## 289 4 Discussion

290 Our analyses support the overall conclusion that completing a primary vaccination sequence is  
291 protective against the development or persistence of Long COVID defined either as the presence  
292 of Long COVID symptoms four weeks after COVID-19 infection or diagnosis with Long COVID in  
293 adults. These results are consistent with much of the established literature [1, 6–9, 11, 27, 30].

294 We also find that the effect of a booster dose of COVID-19 vaccination does not necessarily  
295 provide additional protective effect against the persistence or development of Long COVID symp-  
296 toms four weeks after COVID-19 infection or diagnosis with Long COVID (Fig. 2, Fig. 4, Fig. 6,  
297 Fig. 8). We find that the magnitude of any protective effects are dependent on how the vaccination  
298 is modelled (time-independent versus time-dependent) as well as the definition of Long COVID be-  
299 ing used (development of Long COVID symptoms versus diagnosis with Long COVID). This result  
300 is consistent with existing literature indicating an inconsistent and unclear effect, if any, of booster

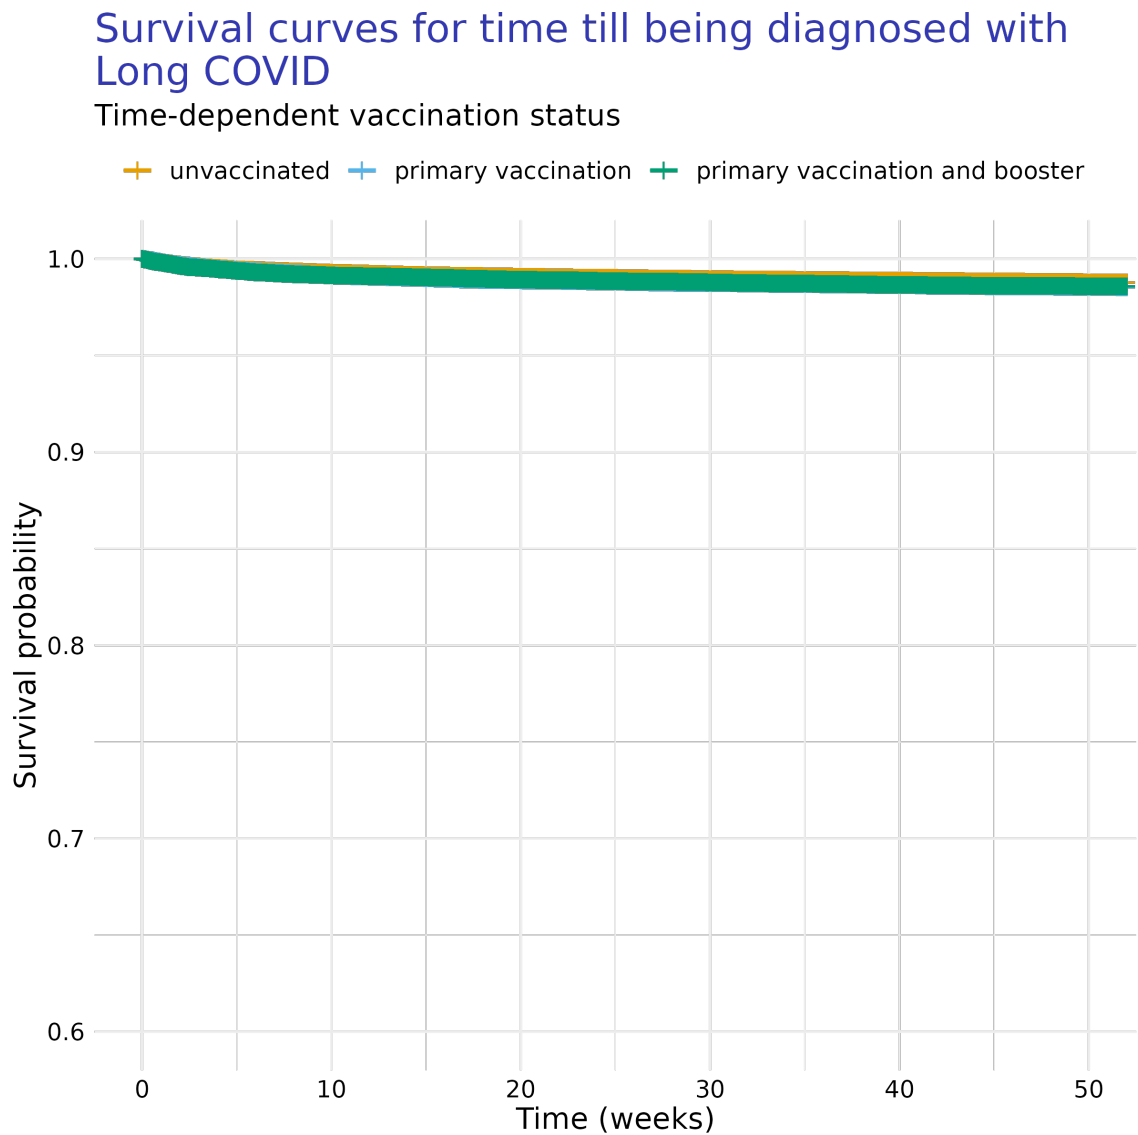

Figure 7: Kaplan-Meier curves for time till diagnosis with Long COVID depending on a patient's COVID-19 vaccination states (i.e., unvaccinated, completed primary vaccination sequence, and vaccinated plus having received a booster doses). For this analysis, we considered vaccination and booster states as time-dependent covariates, meaning they can happen at any point relative to T0.

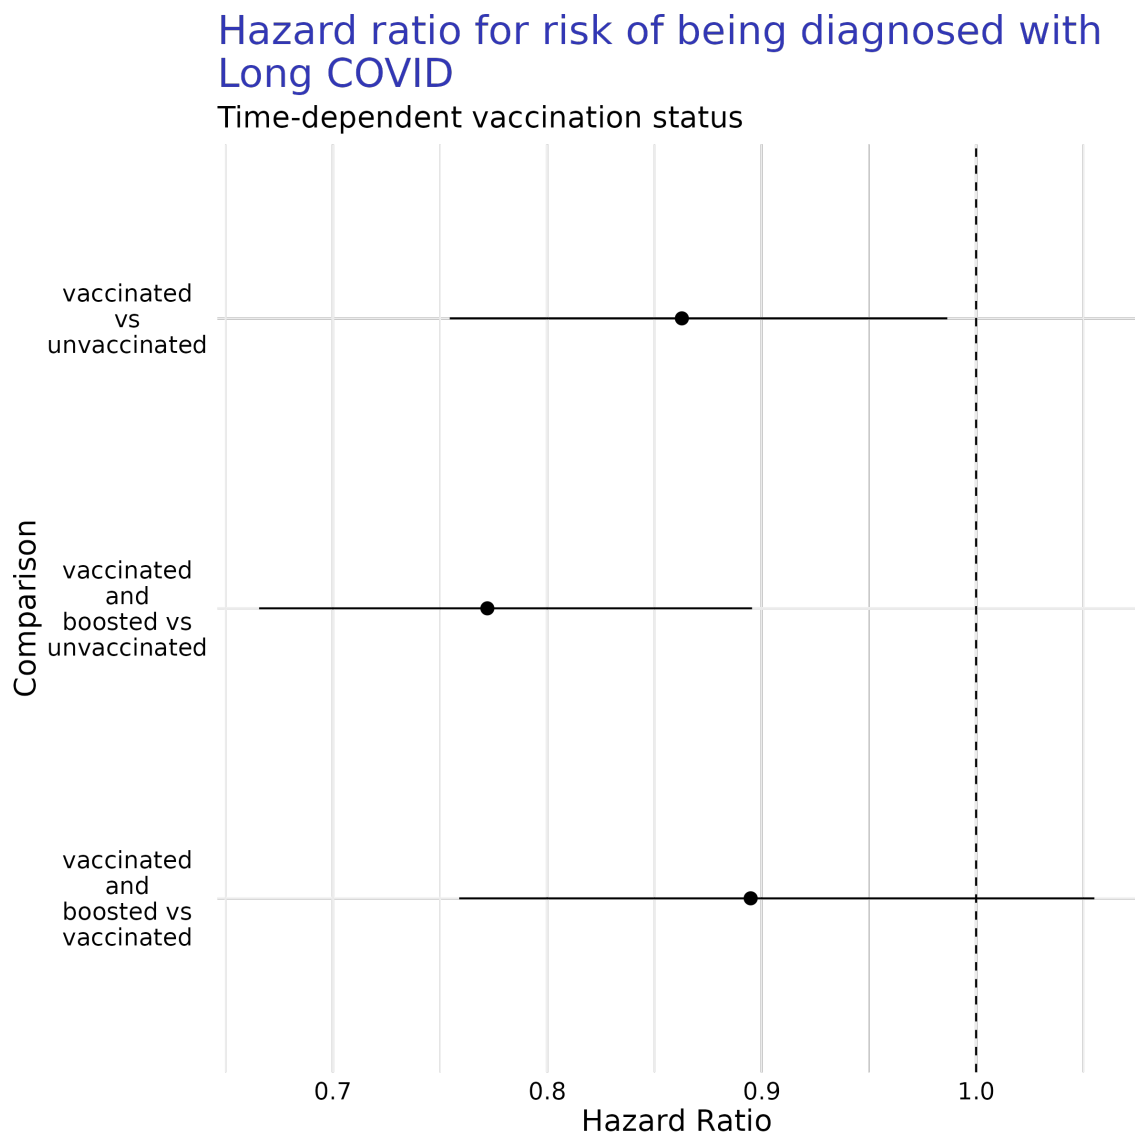

Figure 8: Comparison of estimated hazard ratios for risk of diagnosis with Long COVID symptoms after COVID-19 infection based on a person's vaccination state at time of COVID-19 infection (i.e., unvaccinated, completed primary vaccination sequence, and vaccinated plus having received a booster doses). Estimates are presented with 95% confidence intervals. For this analysis, we considered vaccination and booster states as time-dependent covariates, meaning they can happen at any point relative to T0.

301 doses of COVID-19 vaccine against Long COVID [7–9]. Future work can assess if this result still  
302 holds as the population of people who have received a COVID-19 booster vaccine dose increases.

303 One of our most striking results is the lack of overlap in patients experiencing persistent or  
304 who developed Long COVID symptoms four weeks after COVID-19 infection versus those patients  
305 who were diagnosed with Long COVID (Table 2). Some degree of bias has previously been found  
306 in the assignment of ICD-10-CM codes for Long COVID [5], which may indicate that adoption  
307 of these codes is heterogeneous across providers and within health care systems. Additionally,  
308 Long COVID is a diagnosis of exclusion [2], which may lead to a delay in the addition of a Long  
309 COVID diagnostic code to a patient’s chart when compared to the addition of a Long COVID  
310 related symptom. Similarly, the symptoms based definition may be capturing patients who may  
311 not eventually be diagnosed with Long COVID. Symptom based definitions of Long COVID may  
312 have high sensitivity but low specificity for the condition while diagnosis based definitions may  
313 have high specificity but low sensitivity. More work should be done to define a gold standard for  
314 defining this condition. Finally, because there has been limited adoption of a standard definition of  
315 Long COVID the individual provider application of these codes and changing practices over time  
316 might account for substantial variation between those with Long COVID-like symptoms and those  
317 diagnosed with Long COVID [3].

318 Like all studies of EHR data, ours is subject to a variety of known limitations [56–61]. We  
319 are only able to identify events that are captured by the constituent health care systems that are  
320 a part of the Truveta member system. This means we will not capture COVID-19 infections or  
321 vaccinations which were recorded in a health care system that is not a part of Truveta. Similarly,  
322 we will not capture COVID-19 infections or vaccinations which were never reported to a health  
323 care system. This limitation means patients with a precedent COVID-19 infection may be missed  
324 as part of our inclusion and exclusion criteria. Another example limitation is that a patient’s  
325 COVID-19 vaccination status may not captured in our data because some member HCS may not  
326 reconcile their records with state health registries and other locations where patients receive care.  
327 Finally, comorbidity status may be misclassified in our data set because it is captured in a different,  
328 non-member HCS or are classified in the EHR using codes that were not present in our codesets.  
329 These are common and well understood limitations associated with using EHR data.

330 An additional limitation of our study was that we did not account for any potential differences in  
331 effect of vaccinations having to do with manufacturer or the type of booster dose. For example, we  
332 did not distinguish if a booster dose was from a bivalent formulation or not. This limitation means  
333 that we cannot distinguish if there is differences in protective effect against Long COVID associated  
334 with a particular make of vaccine. Future work can assess if there differences associated with  
335 different makes of COVID-19 vaccine that able to be estimated and if there are further meaningful  
336 differences associated with the type of booster dose a patient received. Additionally, our study  
337 focused on an adult population, so our results may not generalizable to pediatric populations, so a  
338 potential future avenue of study is a focused analysis of pediatric patients.

339 In the context of this study, these inherent limitations will most likely lead to an underestimation  
340 of the number of patients who experienced a COVID-19 infection and an underestimation of how  
341 many of those patients completed a primary COVID-19 vaccination sequence or received a booster  
342 dose and when. Under counting can result in underestimation of the effect of vaccination on  
343 persistence or development of Long COVID symptoms or diagnosis with Long COVID because  
344 individuals with unknown vaccination status will be incorrectly treated as unvaccinated which  
345 reduces the observed difference between patients who are unvaccinated versus patients who are  
346 vaccinated, and cause us to underestimate the protective effect of vaccination on risk of developing

347 Long COVID symptoms or being diagnosed with Long COVID. By focusing our study on patients  
348 who experienced a positive COVID-19 test as recorded by the hospital systems, we hoped to limit  
349 the possibility of underestimating the vaccinated population as it represents individuals who are  
350 potentially more likely to interact with their hospital system than not.

351 This study adds to the growing literature demonstrating the protective effects of vaccination  
352 against Long COVID. Additionally, this study highlights how the definition of Long COVID impacts  
353 the estimated protective effect, if any, of completing a primary COVID-19 vaccination sequence or  
354 receiving a booster dose on the risk of persistent Long COVID symptoms or diagnosis with Long  
355 COVID. Inconsistency in defining this condition hinders study of this important topic.

## 356 Acknowledgements

357 The authors thank Mackenzie Bogiages, Grace Turner, Jesse Weiss, Mohan Dharmarajan, and the  
358 clinical informaticists at Truveta for their assistance and input during the design and development  
359 of this study.

## 360 Competing Interests

361 All authors are employees of Truveta, Incorporated.

## 362 Institutional Review Board Approval

363 This study performs analysis of de-identified electronic health records (EHR) data accessed via Tru-  
364 veta Studio. Truveta Studio only contains data that has been de-identified by expert determination  
365 in accordance with HIPAA Privacy Rule, and therefore this study was exempt from Institutional  
366 Review Board approval.

## 367 Data Availability Statement

368 The data used in this study is available to all Truveta subscribers and may be accessed at `studio`  
369 `.truveta.com`.

370 The R code used to perform all analyses and generate all tables and figures is available on  
371 GitHub at [https://github.com/Truveta/smits\\_et\\_al\\_vaccines\\_long\\_covid](https://github.com/Truveta/smits_et_al_vaccines_long_covid).

## 372 References

- 373 [1] Ziyad Al-Aly, Yan Xie, and Benjamin Bowe. High-dimensional characterization of post-acute  
374 sequelae of COVID-19. *Nature*, 594(7862):259–264, apr 2021. doi: 10.1038/s41586-021-03553-9.  
375 URL <https://doi.org/10.1038/s41586-021-03553-9>.
- 376 [2] Joan B Soriano, Srinivas Murthy, John C Marshall, Pryanka Relan, and Janet V Diaz. A clinical  
377 case definition of post-COVID-19 condition by a delphi consensus. *The Lancet Infectious*  
378 *Diseases*, 22(4):e102–e107, apr 2022. doi: 10.1016/s1473-3099(21)00703-9. URL [https://doi.org/10.1016/s1473-3099\(21\)00703-9](https://doi.org/10.1016/s1473-3099(21)00703-9).

- 380 [3] Leah J. McGrath, Amie M. Scott, Andy Surinach, Richard Chambers, Michael Benigno, and  
381 Deepa Malhotra. Use of the postacute sequelae of COVID-19 diagnosis code in routine clinical  
382 practice in the US. *JAMA Network Open*, 5(10):e2235089, oct 2022. doi: 10.1001/jamanetw  
383 orkopen.2022.35089. URL <https://doi.org/10.1001%2Fjamanetworkopen.2022.35089>.
- 384 [4] Sameer S. Kadri, Jake Gundrum, Sarah Warner, Zhun Cao, Ahmed Babiker, Michael Klompas,  
385 and Ning Rosenthal. Uptake and accuracy of the diagnosis code for COVID-19 among US  
386 hospitalizations. *JAMA*, 324(24):2553, dec 2020. doi: 10.1001/jama.2020.20323. URL  
387 <https://doi.org/10.1001%2Fjama.2020.20323>.
- 388 [5] Emily R. Pfaff, Charisse Madlock-Brown, John M. Baratta, Abhishek Bhatia, Hannah Davis,  
389 Andrew Girvin, Elaine Hill, Elizabeth Kelly, Kristin Kostka, Johanna Loomba, Julie A. Mc-  
390 Murry, Rachel Wong, Tellen D. Bennett, Richard Moffitt, Christopher G. Chute, Melissa  
391 Haendel, and and. Coding long COVID: characterizing a new disease through an ICD-  
392 10 lens. *BMC Medicine*, 21(1), feb 2023. doi: 10.1186/s12916-023-02737-6. URL  
393 <https://doi.org/10.1186%2Fs12916-023-02737-6>.
- 394 [6] Claire E. Hastie, David J. Lowe, Andrew McAuley, Andrew J. Winter, Nicholas L. Mills, Corri  
395 Black, Janet T. Scott, Catherine A. O'Donnell, David N. Blane, Susan Browne, Tracy R.  
396 Ibbotson, and Jill P. Pell. Outcomes among confirmed cases and a matched comparison group  
397 in the long-COVID in scotland study. *Nature Communications*, 13(1), oct 2022. doi: 10.1038/  
398 s41467-022-33415-5. URL <https://doi.org/10.1038%2Fs41467-022-33415-5>.
- 399 [7] Kin Israel Notarte, Jesus Alfonso Catahay, Jacqueline Veronica Velasco, Adriel Pastrana,  
400 Abbygail Therese Ver, Flos Carmeli Pangilinan, Princess Juneire Peligro, Michael Casimiro,  
401 Jonathan Jaime Guerrero, Ma. Margarita Leticia Gellaco, Giuseppe Lippi, Brandon Michael  
402 Henry, and César Fernández de-las Peñas. Impact of COVID-19 vaccination on the risk  
403 of developing long-COVID and on existing long-COVID symptoms: A systematic review.  
404 *eClinicalMedicine*, 53:101624, nov 2022. doi: 10.1016/j.eclinm.2022.101624. URL  
405 <https://doi.org/10.1016%2Fj.eclinm.2022.101624>.
- 406 [8] Oyungerel Byambasuren, Paulina Stehlik, Justin Clark, Kylie Alcorn, and Paul Glasziou. Effect  
407 of covid-19 vaccination on long covid: systematic review. *BMJ Medicine*, 2(1):e000385, feb  
408 2023. doi: 10.1136/bmjmed-2022-000385. URL <https://doi.org/10.1136%2Fbmjmed-2022-000385>.
- 410 [9] Atsuyuki Watanabe, Masao Iwagami, Jun Yasuhara, Hisato Takagi, and Toshiki Kuno. Pro-  
411 tective effect of COVID-19 vaccination against long COVID syndrome: A systematic re-  
412 view and meta-analysis. *Vaccine*, feb 2023. doi: 10.1016/j.vaccine.2023.02.008. URL  
413 <https://doi.org/10.1016%2Fj.vaccine.2023.02.008>.
- 414 [10] Megan Landry, Sydney Bornstein, Nitasha Nagaraj, Gary A. Sardon, Amanda Castel, Amita  
415 Vyas, Karen McDonnell, Mira Agneshwar, Alyson Wilkinson, and Lynn Goldman. Postacute  
416 sequelae of SARS-CoV-2 in university setting. *Emerging Infectious Diseases*, 29(3):519–527,  
417 mar 2023. doi: 10.3201/eid2903.221522. URL <https://doi.org/10.3201%2Feid2903.221522>.
- 419 [11] Ziyad Al-Aly, Benjamin Bowe, and Yan Xie. Long COVID after breakthrough SARS-CoV-2  
420 infection. *Nature Medicine*, 28(7):1461–1467, may 2022. doi: 10.1038/s41591-022-01840-0.  
421 URL <https://doi.org/10.1038%2Fs41591-022-01840-0>.



- 422 [12] Michela Antonelli, Rose S Penfold, Jordi Merino, Carole H Sudre, Erika Molteni, Sarah  
423 Berry, Liane S Canas, Mark S Graham, Kerstin Klaser, Marc Modat, Benjamin Murray,  
424 Eric Kerfoot, Liyuan Chen, Jie Deng, Marc F Österdahl, Nathan J Cheetham, David A  
425 Drew, Long H Nguyen, Joan Capdevila Pujol, Christina Hu, Somesh Selvachandran, Lorenzo  
426 Polidori, Anna May, Jonathan Wolf, Andrew T Chan, Alexander Hammers, Emma L Dun-  
427 can, Tim D Spector, Sebastien Ourselin, and Claire J Steves. Risk factors and disease pro-  
428 file of post-vaccination SARS-CoV-2 infection in UK users of the COVID symptom study  
429 app: a prospective, community-based, nested, case-control study. *The Lancet Infectious*  
430 *Diseases*, 22(1):43–55, jan 2022. doi: 10.1016/s1473-3099(21)00460-6. URL <https://doi.org/10.1016%2Fs1473-3099%2821%2900460-6>.  
431
- 432 [13] Daniel Ayoubkhani, Matthew L Bosworth, Sasha King, Koen B Pouwels, Myer Glickman,  
433 Vahé Nafilyan, Francesco Zaccardi, Kamlesh Khunti, Nisreen A Alwan, and A Sarah Walker.  
434 Risk of long COVID in people infected with severe acute respiratory syndrome coronavirus  
435 2 after 2 doses of a coronavirus disease 2019 vaccine: Community-based, matched cohort  
436 study. *Open Forum Infectious Diseases*, 9(9), sep 2022. doi: 10.1093/ofid/ofac464. URL  
437 <https://doi.org/10.1093%2Fofid%2Fofac464>.
- 438 [14] Elena Azzolini, Riccardo Levi, Riccardo Sarti, Chiara Pozzi, Maximiliano Mollura, Alberto  
439 Mantovani, and Maria Rescigno. Association between BNT162b2 vaccination and long COVID  
440 after infections not requiring hospitalization in health care workers. *JAMA*, 328(7):676, aug  
441 2022. doi: 10.1001/jama.2022.11691. URL <https://doi.org/10.1001%2Fjama.2022.11691>.
- 442 [15] Sokratis N Zisis, Jared C Durieux, Christian Mouchati, Jamie A Perez, and Grace A Mc-  
443 Comsey. The protective effect of coronavirus disease 2019 (COVID-19) vaccination on post-  
444 acute sequelae of COVID-19: A multicenter study from a large national health research net-  
445 work. *Open Forum Infectious Diseases*, 9(7), may 2022. doi: 10.1093/ofid/ofac228. URL  
446 <https://doi.org/10.1093%2Fofid%2Fofac228>.
- 447 [16] Joy Jiang, Lili Chan, Justin Kauffman, Jagat Narula, Alexander W. Charney, Wonsuk Oh,  
448 and GIrish Nadkarni. Impact of vaccination on major adverse cardiovascular events in patients  
449 with COVID-19 infection. *Journal of the American College of Cardiology*, feb 2023. doi:  
450 10.1016/j.jacc.2022.12.006. URL <https://doi.org/10.1016%2Fj.jacc.2022.12.006>.
- 451 [17] Bernardo Meza-Torres, Gayathri Delanerolle, Cecilia Okusi, Nikhil Mayor, Sneha Anand, Jack  
452 Macartney, Piers Gatenby, Ben Glampson, Martin Chapman, Vasa Curcin, Erik Mayer, Mark  
453 Joy, Trisha Greenhalgh, Brendan Delaney, and Simon de Lusignan. Differences in clinical  
454 presentation with long COVID after community and hospital infection and associations with  
455 all-cause mortality: English sentinel network database study. *JMIR Public Health and Surveil-*  
456 *lance*, 8(8):e37668, aug 2022. doi: 10.2196/37668. URL <https://doi.org/10.2196%2F37668>.
- 457 [18] Anuradhaa Subramanian, Krishnarajah Nirantharakumar, Sarah Hughes, Puja Myles, Tim  
458 Williams, Krishna M. Gokhale, Tom Taverner, Joht Singh Chandan, Kirsty Brown, Nikita  
459 Simms-Williams, Anoop D. Shah, Megha Singh, Farah Kidy, Kelvin Okoth, Richard Hotham,  
460 Nasir Bashir, Neil Cockburn, Siang Ing Lee, Grace M. Turner, Georgios V. Gkoutos,  
461 Olalekan Lee Aiyegbusi, Christel McMullan, Alastair K. Denniston, Elizabeth Sapey, Janet M.  
462 Lord, David C. Wraith, Edward Leggett, Clare Iles, Tom Marshall, Malcolm J. Price, Steven  
463 Marwaha, Elin Haf Davies, Louise J. Jackson, Karen L. Matthews, Jenny Camaradou, Melanie

- 464 Calvert, and Shamil Haroon. Symptoms and risk factors for long COVID in non-hospitalized  
465 adults. *Nature Medicine*, 28(8):1706–1714, jul 2022. doi: 10.1038/s41591-022-01909-w. URL  
466 <https://doi.org/10.1038/s41591-022-01909-w>.
- 467 [19] George N. Ioannou, Aaron Baraff, Alexandra Fox, Troy Shahoumian, Alex Hickok, Ann M.  
468 O’Hare, Amy S. B. Bohnert, Edward J. Boyko, Matthew L. Maciejewski, C. Barrett Bowling,  
469 Elizabeth Viglianti, Theodore J. Iwashyna, and Denise M. Hynes. Rates and factors associated  
470 with documentation of diagnostic codes for long COVID in the national veterans affairs health  
471 care system. *JAMA Network Open*, 5(7):e2224359, jul 2022. doi: 10.1001/jamanetworkopen.  
472 2022.24359. URL <https://doi.org/10.1001/jamanetworkopen.2022.24359>.
- 473 [20] Nicholas M Mohr, Ian D Plumb, Kari K Harland, Tamara Pilishvili, Katherine E Fleming-  
474 Dutra, Anusha Krishnadasan, Karin F Hoth, Sharon H Saydah, Zachary Mankoff, John P  
475 Haran, Melissa Briggs-Hagen, Eliezer Santos León, and David A Talan. Presence of symptoms  
476 6 weeks after COVID-19 among vaccinated and unvaccinated US healthcare personnel: a  
477 prospective cohort study. *BMJ Open*, 13(2):e063141, feb 2023. doi: 10.1136/bmjopen-2022-0  
478 63141. URL <https://doi.org/10.1136/bmjopen-2022-063141>.
- 479 [21] Jonika Tannous, Alan P Pan, Thomas Potter, Abdulaziz T Bako, Katharine Dlouhy, Ashley  
480 Drews, Henry Dirk Sostman, and Farhaan S Vahidy. Real-world effectiveness of COVID-19  
481 vaccines and anti-SARS-CoV-2 monoclonal antibodies against postacute sequelae of SARS-  
482 CoV-2: analysis of a COVID-19 observational registry for a diverse US metropolitan popu-  
483 lation. *BMJ Open*, 13(4):e067611, apr 2023. doi: 10.1136/bmjopen-2022-067611. URL  
484 <https://doi.org/10.1136/bmjopen-2022-067611>.
- 485 [22] Maxime Taquet, Quentin Dercon, and Paul J. Harrison. Six-month sequelae of post-vaccination  
486 SARS-CoV-2 infection: A retrospective cohort study of 10,024 breakthrough infections. *Brain,*  
487 *Behavior, and Immunity*, 103:154–162, jul 2022. doi: 10.1016/j.bbi.2022.04.013. URL  
488 <https://doi.org/10.1016/j.bbi.2022.04.013>.
- 489 [23] Tessa van der Maaden, Elizabeth N Mutubuki, Siméon de Bruijn, Ka Yin Leung, Hans Knoop,  
490 Jaap Slootweg, Anna D Tulen, Albert Wong, Albert Jan van Hoek, Eelco Franz, and Cees C  
491 van den Wijngaard. Prevalence and severity of symptoms 3 months after infection with SARS-  
492 CoV-2 compared to test-negative and population controls in the netherlands. *The Journal of*  
493 *Infectious Diseases*, dec 2022. doi: 10.1093/infdis/jiac474. URL <https://doi.org/10.1093/infdis/jiac474>.
- 495 [24] Suraj Singh Senjam, Yatan Pal Singh Balhara, Parmeshwar Kumar, Neeraj Nichal, Souvik  
496 Manna, Karan Madan, Nishat Hussain Ahmed, Noopur Gupta, Rajesh Sharma, Yashdeep  
497 Gupta, Animesh Ray, Vivek Gupta, Praveen Vashist, Atul Kumar, Lalit Dar, Jeevan Singh  
498 Titiyal, Radhika Tandon, and Randeep Gulleira. Assessment of post covid-19 health problems  
499 and its determinants in north india: A descriptive cross section study. *medRxiv*, 2021. doi:  
500 10.1101/2021.10.03.21264490. URL <https://www.medrxiv.org/content/early/2021/10/07/2021.10.03.21264490>.
- 502 [25] Paul Kuodi, Yanay Gorelik, Hiba Zayyad, Ofir Wertheim, Karine Beiruti Wiegler, Kamal Abu  
503 Jabal, Amiel A. Dror, Saleh Nazzal, Daniel Glikman, and Michael Edelstein. Association  
504 between BNT162b2 vaccination and reported incidence of post-COVID-19 symptoms: cross-  
505 sectional study 2020-21, israel. *npj Vaccines*, 7(1), aug 2022. doi: 10.1038/s41541-022-00526-5.  
506 URL <https://doi.org/10.1038/s41541-022-00526-5>.

- 507 [26] Mayssam Nehme, Olivia Braillard, Julien Salamun, Frédérique Jacquierioz, Delphine S. Cour-  
508 voisier, Hervé Spechbach, and Idris Guessous. Symptoms after COVID-19 vaccination in pa-  
509 tients with post-acute sequelae of SARS-CoV-2. *Journal of General Internal Medicine*, 37(6):  
510 1585–1588, feb 2022. doi: 10.1007/s11606-022-07443-2. URL <https://doi.org/10.1007%2Fs11606-022-07443-2>.
- 512 [27] Vasiliki Tsampasian, Hussein Elghazaly, Rahul Chattopadhyay, Maciej Debski, Thin Kyi Phyu  
513 Naing, Pankaj Garg, Allan Clark, Eleana Ntatsaki, and Vassilios S. Vassiliou. Risk factors  
514 associated with post-COVID-19 condition. *JAMA Internal Medicine*, mar 2023. doi: 10.1001/  
515 jamainternmed.2023.0750. URL <https://doi.org/10.1001%2Fjamainternmed.2023.0750>.
- 516 [28] Daniel Ayoubkhani, Charlotte Bermingham, Koen B Pouwels, Myer Glickman, Vahé Nafilyan,  
517 Francesco Zaccardi, Kamlesh Khunti, Nisreen A Alwan, and A Sarah Walker. Trajectory of  
518 long covid symptoms after covid-19 vaccination: community based cohort study. *BMJ*, page  
519 e069676, may 2022. doi: 10.1136/bmj-2021-069676. URL <https://doi.org/10.1136%2Fbmj-2021-069676>.
- 521 [29] Elke Wynberg, Alvin X. Han, Anders Boyd, Hugo D.G. van Willigen, Anouk Verveen, Romy  
522 Lebbink, Karlijn van der Straten, Neeltje Kootstra, Marit J. van Gils, Colin Russell, Tjalling  
523 Leenstra, Menno D. de Jong, Godelieve J. de Bree, and Maria Prins. The effect of SARS-  
524 CoV-2 vaccination on post-acute sequelae of COVID-19 (PASC): A prospective cohort study.  
525 *Vaccine*, 40(32):4424–4431, jul 2022. doi: 10.1016/j.vaccine.2022.05.090. URL <https://doi.org/10.1016%2Fj.vaccine.2022.05.090>.
- 527 [30] Stephanie A. Richard, Simon D. Pollett, Anthony C. Fries, Catherine M. Berjohn, Ryan C.  
528 Maves, Tahaniyat Lalani, Alfred G. Smith, Rupal M. Mody, Anuradha Ganesan, Rhonda E.  
529 Colombo, David A. Lindholm, Michael J. Morris, Nikhil Huprikar, Christopher J. Colombo,  
530 Cristian Madar, Milissa Jones, Derek T. Larson, Samantha E. Bazan, Katrin Mende, David  
531 Saunders, Jeffrey Livezey, Charlotte A. Lanteri, Ann I. Scher, Celia Byrne, Jennifer Rusiecki,  
532 Evan Ewers, Nusrat J. Epsi, Julia S. Rozman, Caroline English, Mark P. Simons, David R.  
533 Tribble, Brian K. Agan, Timothy H. Burgess, Terry Merritt, Susan Chambers, Cristin Mount,  
534 Michael Stein, Catherine Uyehara, Heidi Adams, Patrick Hickey, Edward Parmelee, Mark  
535 Fritschlanski, Tim Chao, Richard Chapleau, Monica Christian, Kelsey Lanter, Jennifer Meyer,  
536 John Iskander, and Kathryn Lago and. Persistent COVID-19 symptoms at 6 months after  
537 onset and the role of vaccination before or after SARS-CoV-2 infection. *JAMA Network Open*,  
538 6(1):e2251360, jan 2023. doi: 10.1001/jamanetworkopen.2022.51360. URL <https://doi.org/10.1001%2Fjamanetworkopen.2022.51360>.
- 540 [31] William David Strain, Ondine Sherwood, Amitava Banerjee, Vicky Van der Togt, Lyth Hish-  
541 meh, and Jeremy Rossman. The impact of COVID vaccination on symptoms of long COVID:  
542 An international survey of people with lived experience of long COVID. *Vaccines*, 10(5):652,  
543 apr 2022. doi: 10.3390/vaccines10050652. URL <https://doi.org/10.3390%2Fvaccines10050652>.
- 545 [32] Marc Scherlinger, Luc Pijnenburg, Emmanuel Chatelus, Laurent Arnaud, Jacques-Eric Got-  
546 tenberg, Jean Sibia, and Renaud Felten. Effect of SARS-CoV-2 vaccination on symp-  
547 toms from post-acute sequelae of COVID-19: Results from the nationwide VAXILONG  
548 study. *Vaccines*, 10(1):46, dec 2021. doi: 10.3390/vaccines10010046. URL <https://doi.org/10.3390%2Fvaccines10010046>.

- 550 [33] Maddalena Peghin, Maria De Martino, Alvisa Palese, Valentina Gerussi, Giulia Bontempo,  
551 Elena Graziano, Erica Visintini, Denise D'Elia, Fabiana Dellai, Francesco Marrella, Martina  
552 Fabris, Francesco Curcio, Assunta Sartor, Miriam Isola, and Carlo Tascini. Post-COVID-  
553 19 syndrome and humoral response association after 1 year in vaccinated and unvaccinated  
554 patients. *Clinical Microbiology and Infection*, 28(8):1140–1148, aug 2022. doi: 10.1016/j.cmi.  
555 2022.03.016. URL <https://doi.org/10.1016%2Fj.cmi.2022.03.016>.
- 556 [34] Tomoya Tsuchida, Masanori Hirose, Yoko Inoue, Hiroyuki Kunishima, Takehito Otsubo, and  
557 Takahide Matsuda. Relationship between changes in symptoms and antibody titers after a  
558 single vaccination in patients with long COVID. *Journal of Medical Virology*, 94(7):3416–3420,  
559 mar 2022. doi: 10.1002/jmv.27689. URL <https://doi.org/10.1002%2Fjmv.27689>.
- 560 [35] Viet-Thi Tran, Elodie Perrodeau, Julia Saldanha, Isabelle Pane, and Philippe Ravaud. Effi-  
561 cacy of COVID-19 vaccination on the symptoms of patients with long COVID: A target trial  
562 emulation using data from the ComPaRe e-cohort in france. *SSRN Electronic Journal*, 2021.  
563 doi: 10.2139/ssrn.3932953. URL <https://doi.org/10.2139%2Fssrn.3932953>.
- 564 [36] Juan P. Wisnivesky, Usha Govindarajulu, Emilia Bagiella, Ruchir Goswami, Minal Kale,  
565 Kirk N. Campbell, Kristin Meliambro, Zijian Chen, Judith A. Aberg, and Jenny J. Lin. As-  
566 sociation of vaccination with the persistence of post-COVID symptoms. *Journal of General  
567 Internal Medicine*, 37(7):1748–1753, mar 2022. doi: 10.1007/s11606-022-07465-w. URL  
568 <https://doi.org/10.1007%2Fs11606-022-07465-w>.
- 569 [37] DT Arnold, A Milne, E Samms, L Staddon, NA Maskell, and FW Hamilton. Are vaccines  
570 safe in patients with long covid? a prospective observational study. *medRxiv*, 2021. doi:  
571 10.1101/2021.03.11.21253225. URL <https://www.medrxiv.org/content/early/2021/03/14/2021.03.11.21253225.1>.
- 573 [38] Tarek AZ K Gaber, Abdul Ashish, Alison Unsworth, and Jane Martindale. Are mrna covid  
574 19 vaccines safe in long covid patients? a health care workers perspective. *British Journal of  
575 Medical Practitioners*, 14(1), 2021.
- 576 [39] Michael A. Simon, Ryan D. Luginbuhl, and Richard Parker. Reduced incidence of long-covid  
577 symptoms related to administration of covid-19 vaccines both before covid-19 diagnosis and  
578 up to 12 weeks after. *medRxiv*, 2021. doi: 10.1101/2021.11.17.21263608. URL <https://www.medrxiv.org/content/early/2021/11/18/2021.11.17.21263608>.
- 580 [40] Truveta. Truveta studio, 2023. URL <https://studio.truveta.com>. Accessed on 2023-04-19.
- 581 [41] ICD10data.com. 2023 icd-10-cm diagnosis code u09.9, 2023. URL <https://www.icd10data.com/ICD10CM/Codes/U00-U85/U00-U49/U09-/U09.9>. Accessed on 2023-04-19.
- 583 [42] cdc.gov. Stay up to date with covid-19 vaccines including boosters, 2023. URL [https://ww  
584 w.cdc.gov/coronavirus/2019-ncov/vaccines/stay-up-to-date.html#recommendations](https://www.cdc.gov/coronavirus/2019-ncov/vaccines/stay-up-to-date.html#recommendations).  
585 Accessed on 2023-04-19.
- 586 [43] Terry M. Therneau and Patricia M. Grambsch. *Modeling Survival Data: Extending the Cox  
587 Model*. Springer, New York, 2000. ISBN 0-387-98784-3.
- 588 [44] Russell V. Lenth. *emmeans: Estimated Marginal Means, aka Least-Squares Means*, 2023. URL  
589 <https://github.com/rvlenth/emmeans>. R package version 1.8.4-1.

- 590 [45] Terry M Therneau. *survival: Survival Analysis*, 2023. URL [https://github.com/therneau/](https://github.com/therneau/survival)  
591 [survival](https://github.com/therneau/survival). R package version 3.5-3.
- 592 [46] R Core Team. *R: A Language and Environment for Statistical Computing*. R Foundation for  
593 Statistical Computing, Vienna, Austria, 2022. URL <https://www.R-project.org/>.
- 594 [47] David Robinson, Alex Hayes, and Simon Couch. *broom: Convert Statistical Objects into Tidy*  
595 *Tibbles*, 2022. URL <https://CRAN.R-project.org/package=broom>. R package version 1.0.1.
- 596 [48] Alboukadel Kassambara, Marcin Kosinski, and Przemyslaw Biecek. *survminer: Drawing Sur-*  
597 *vival Curves using ggplot2*, 2021. URL [https://rpkgs.datanovia.com/survminer/index.](https://rpkgs.datanovia.com/survminer/index.html)  
598 [html](https://rpkgs.datanovia.com/survminer/index.html). R package version 0.4.9.
- 599 [49] Hadley Wickham, Romain François, Lionel Henry, and Kirill Müller. *dplyr: A Grammar of*  
600 *Data Manipulation*, 2022. URL <https://CRAN.R-project.org/package=dplyr>. R package  
601 version 1.0.10.
- 602 [50] Vitalie Spinu, Garrett Grolemond, and Hadley Wickham. *lubridate: Make Dealing with Dates*  
603 *a Little Easier*, 2023. URL <https://CRAN.R-project.org/package=lubridate>. R package  
604 version 1.9.1.
- 605 [51] Lionel Henry and Hadley Wickham. *rlang: Functions for Base Types and Core R and Tidyverse*  
606 *Features*, 2022. URL <https://CRAN.R-project.org/package=rlang>. R package version 1.0.6.
- 607 [52] Hadley Wickham, Davis Vaughan, and Maximilian Girlich. *tidyr: Tidy Messy Data*, 2023.  
608 URL <https://CRAN.R-project.org/package=tidyr>. R package version 1.3.0.
- 609 [53] Neal Richardson, Ian Cook, Nic Crane, Jonathan Keane, Romain François,  
610 Jeroen Ooms, and Apache Arrow. *arrow: Integration to Apache 'Arrow'*, 2022.  
611 <https://github.com/apache/arrow/>.
- 612 [54] Benjamin Rich. *table1: Tables of Descriptive Statistics in HTML*, 2021. URL [https://gith](https://github.com/benjaminrich/table1)  
613 [ub.com/benjaminrich/table1](https://github.com/benjaminrich/table1). R package version 1.4.2.
- 614 [55] David B. Dahl, David Scott, Charles Roosen, Arni Magnusson, and Jonathan Swinton. *xtable:*  
615 *Export Tables to LaTeX or HTML*, 2019. URL <http://xtable.r-forge.r-project.org/>.  
616 R package version 1.8-4.
- 617 [56] William R. Hersh, Mark G. Weiner, Peter J. Embi, Judith R. Logan, Philip R.O. Payne,  
618 Elmer V. Bernstam, Harold P. Lehmann, George Hripcsak, Timothy H.artzog, James J.  
619 Cimino, and Joel H. Saltz. Caveats for the use of operational electronic health record data in  
620 comparative effectiveness research. *Medical Care*, 51:S30–S37, 2013. doi: 10.1097/mlr.0b013e  
621 31829b1dbd.
- 622 [57] J Marc Overhage and Lauren M Overhage. Sensible use of observational clinical data. *Statistical*  
623 *Methods in Medical Research*, 22(1):7–13, 2013. doi: 10.1177/0962280211403598.
- 624 [58] Clemens Scott Kruse, Anna Stein, Heather Thomas, and Harmander Kaur. The use of elec-  
625 tronic health records to support population health: A systematic review of the literature.  
626 *Journal of Medical Systems*, 42:214, 2018. doi: 10.1007/s10916-018-1075-6.

- 627 [59] Peter B. Jensen, Lars J. Jensen, and Søren Brunak. Mining electronic health records: towards  
628 better research applications and clinical care. *Nature Reviews Genetics*, 13:395–405, 2012. doi:  
629 10.1038/nrg3208.
- 630 [60] Suchitra Kataria and Vinod Ravindran. Electronic health records: A critical appraisal of  
631 strengths and limitations. *Journal of the Royal College of Physicians of Edinburgh*, 50(3):262–  
632 268, 2020. doi: 10.4997/jrcpe.2020.309. URL <https://doi.org/10.4997/jrcpe.2020.309>.  
633 PMID: 32936099.
- 634 [61] JANE M. CARRINGTON and JUDITH A. EFFKEN. Strengths and limitations of the elec-  
635 tronic health record for documenting clinical events. *CIN: Computers, Informatics, Nursing*,  
636 29(6):360–367, 2011. doi: 10.1097/ncn.0b013e3181fc4139.
